# Supplementary material
Source: ML conference proceedings conference paper supplement (https://openreview.net/forum?id=EJKLVMB_9T)
Supplement: supplementary_material [file attachment]

---

# **FAdo Documentation**

***Release 1.2***

**Rogério Reis & Nelma Moreira**

February 09, 2015



|          |                                                                                  |           |
|----------|----------------------------------------------------------------------------------|-----------|
| <b>1</b> | <b>What is FAdo?</b>                                                             | <b>3</b>  |
| 1.1      | Regular Languages . . . . .                                                      | 3         |
| 1.2      | Finite Languages . . . . .                                                       | 3         |
| 1.3      | Transducers . . . . .                                                            | 4         |
| 1.4      | Codes . . . . .                                                                  | 4         |
| <b>2</b> | <b>Module: Finite Automata (fa)</b>                                              | <b>5</b>  |
| 2.1      | Class FA (abstract class for Finite Automata) . . . . .                          | 5         |
| 2.2      | Class SemiDFA (Semi-Automata class) . . . . .                                    | 10        |
| 2.3      | Class OFA (one-way finite automata class) . . . . .                              | 11        |
| 2.4      | Class DFA (Deterministic Finite Automata) . . . . .                              | 14        |
| 2.5      | Class NFA (Nondeterministic Finite Automata) . . . . .                           | 25        |
| 2.6      | Class NFAR (Nondeterministic Finite Automata w/ reverse transition f.) . . . . . | 32        |
| 2.7      | Class GFA (Generalized Finite Automata) . . . . .                                | 34        |
| 2.8      | Class SSemiGroup (Syntactic SemiGroup) . . . . .                                 | 36        |
| 2.9      | Class EnumL (Language Enumeration) . . . . .                                     | 37        |
| 2.10     | Functions . . . . .                                                              | 38        |
| <b>3</b> | <b>Module: Common Definitions (“common”)</b>                                     | <b>39</b> |
| 3.1      | Class Word . . . . .                                                             | 39        |
| <b>4</b> | <b>Module: FAdo IO Functions (“fio”)</b>                                         | <b>41</b> |
| 4.1      | Class ParserFAdo (Yappy parser for FAdo FA files) . . . . .                      | 41        |
| 4.2      | Functions . . . . .                                                              | 41        |
| <b>5</b> | <b>Module: Regular Expressions (reex)</b>                                        | <b>43</b> |
| 5.1      | Class regexp (regular expression) . . . . .                                      | 43        |
| 5.2      | Class specialConstant . . . . .                                                  | 49        |
| 5.3      | Class epsilon . . . . .                                                          | 50        |
| 5.4      | Class emptyset . . . . .                                                         | 51        |
| 5.5      | Class connective . . . . .                                                       | 52        |
| 5.6      | Class star . . . . .                                                             | 52        |
| 5.7      | Class concat . . . . .                                                           | 53        |
| 5.8      | Class disj . . . . .                                                             | 54        |
| 5.9      | Class position . . . . .                                                         | 55        |
| 5.10     | Class ParseReg . . . . .                                                         | 55        |
| 5.11     | Functions . . . . .                                                              | 55        |
| <b>6</b> | <b>Module: Extended Regular Expressions (xre)</b>                                | <b>57</b> |
| 6.1      | Class xre (extended regular expression) . . . . .                                | 57        |
| 6.2      | Functions . . . . .                                                              | 59        |
| <b>7</b> | <b>Module: Transducers (transducers)</b>                                         | <b>61</b> |
| 7.1      | Class Transducer . . . . .                                                       | 61        |
| 7.2      | Class SFT (Standard Form Transducers) . . . . .                                  | 61        |

|           |                                                                      |            |
|-----------|----------------------------------------------------------------------|------------|
| 7.3       | Functions . . . . .                                                  | 65         |
| <b>8</b>  | <b>Module: Finite Languages (<code>fl</code>)</b>                    | <b>67</b>  |
| 8.1       | Class FL (Finite Language) . . . . .                                 | 67         |
| 8.2       | Class DCFA (Deterministic Cover Finite Automata) . . . . .           | 68         |
| 8.3       | Class AFA (Acyclic Finite Automata) . . . . .                        | 69         |
| 8.4       | Class ADFA (Acyclic Deterministic Finite Automata) . . . . .         | 70         |
| 8.5       | Class ANFA (Acyclic Non-deterministic Finite Automata) . . . . .     | 71         |
| 8.6       | Class RndWGen (Random Word Generator) . . . . .                      | 72         |
| 8.7       | Functions . . . . .                                                  | 72         |
| <b>9</b>  | <b>Module: graphs (graph creation and manipulation)</b>              | <b>75</b>  |
| <b>10</b> | <b>Module: Context Free Grammars Manipulation (<code>cfg</code>)</b> | <b>79</b>  |
| 10.1      | Class CFGrammar (Context Free Grammar) . . . . .                     | 79         |
| 10.2      | Class CNF . . . . .                                                  | 79         |
| 10.3      | Class cfgGenerator . . . . .                                         | 80         |
| 10.4      | Class reStringRGenerator (Reg Exp Generator) . . . . .               | 80         |
| 10.5      | Functions . . . . .                                                  | 80         |
| <b>11</b> | <b>Module: Random DFA Generator (<code>rndfa</code>)</b>             | <b>83</b>  |
| 11.1      | Class ICDFArgen (Generator container) . . . . .                      | 83         |
| 11.2      | Class ICDFArnd (Complete IC DFA random generator) . . . . .          | 83         |
| 11.3      | Class ICDFArndIncomple (Incomplete IC DFA generator) . . . . .       | 84         |
| <b>12</b> | <b>Module: Combo Operations (<code>comboperations</code>)</b>        | <b>85</b>  |
| <b>13</b> | <b>Module: Codes (<code>codes</code>)</b>                            | <b>89</b>  |
| 13.1      | Class CodeProperty . . . . .                                         | 89         |
| 13.2      | Class TrajProp . . . . .                                             | 89         |
| 13.3      | Class IPTProp . . . . .                                              | 90         |
| 13.4      | Class IATProp . . . . .                                              | 91         |
| 13.5      | Class PrefixProp . . . . .                                           | 91         |
| 13.6      | Class ErrDetectProp . . . . .                                        | 91         |
| 13.7      | Class ErrCorrectProp . . . . .                                       | 92         |
| 13.8      | Functions . . . . .                                                  | 92         |
| <b>14</b> | <b>Module: Grail Compatibility (<code>grail</code>)</b>              | <b>95</b>  |
| 14.1      | Class ParserGrail . . . . .                                          | 95         |
| 14.2      | Class Grail . . . . .                                                | 95         |
| 14.3      | Functions . . . . .                                                  | 96         |
| <b>15</b> | <b>Module: Verso Language (<code>verso</code>)</b>                   | <b>97</b>  |
| <b>16</b> | <b>A small tutorial for FAdo</b>                                     | <b>99</b>  |
| <b>17</b> | <b>Indices and tables</b>                                            | <b>103</b> |
|           | <b>Python Module Index</b>                                           | <b>105</b> |
|           | <b>Index</b>                                                         | <b>107</b> |

## FAdo: Tools for Language Models Manipulation

*Authors:* Rogério Reis & Nelma Moreira

The support of transducers and all its operations, is a collaborative joint work with *Stavros Konstantinidis* (St. Mary's University, Halifax, NS, Canada) (<http://cs.smu.ca/~stavros/>).

Contributions by

- Marco Almeida
- Ivone Amorim
- Rafaela Bastos
- Hugo Gouveia
- Rizó Isrof
- Eva Maia
- Casey Meijer
- Davide Nabais
- Meng Yang
- Joshua Young

*Page of the project:* <http://fado.dcc.fc.up.pt>.

*Version:* 1.2

*Copyright:* 1999-2014 Rogério Reis & Nelma Moreira {rvr,nam}@dcc.fc.up.pt

*Faculdade de Ciências da Universidade do Porto*

*Centro de Matemática da Universidade do Porto*

### **Licence:**

This program is free software; you can redistribute it and/or modify it under the terms of the GNU General Public License as published by the Free Software Foundation; either version 2 of the License, or (at your option) any later version.

This program is distributed in the hope that it will be useful, but WITHOUT ANY WARRANTY; without even the implied warranty of MERCHANTABILITY or FITNESS FOR A PARTICULAR PURPOSE. See the GNU General Public License for more details.

You should have received a copy of the GNU General Public License along with this program; if not, write to the Free Software Foundation, Inc., 675 Mass Ave, Cambridge, MA 02139, USA.



## WHAT IS FADO?

The **FAdo** system aims to provide an open source extensible high-performance software library for the symbolic manipulation of automata and other models of computation.

To allow high-level programming with complex data structures, easy prototyping of algorithms, and portability (to use in computer grid systems for example), are its main features. Our main motivation is the theoretical and experimental research, but we have also in mind the construction of a pedagogical tool for teaching automata theory and formal languages.

### 1.1 Regular Languages

It currently includes most standard operations for the manipulation of regular languages. Regular languages can be represented by regular expressions (regex) or finite automata, among other formalisms. Finite automata may be deterministic (DFA), non-deterministic (NFA) or generalized (GFA). In **FAdo** these representations are implemented as Python classes.

Elementary regular languages operations as union, intersection, concatenation, complementation and reverse are implemented for each class. Also several combined operations are available for specific models.

Several conversions between these representations are implemented:

- NFA -> DFA: subset construction
- NFA -> RE: recursive method
- GFA -> RE: state elimination, with possible choice of state orderings
- RE -> NFA: Thompson method, Glushkov method, follow, Brzozowski, and partial derivatives.
- For DFAs several minimization algorithms are available: Moore, Hopcroft, and some incremental algorithms. Brzozowski minimization is available for NFAs.
- An algorithm for hyper-minimization of DFAs
- Language equivalence of two DFAs can be determined by reducing their correspondent minimal DFA to a canonical form, or by the Hopcroft and Karp algorithm.
- Enumeration of the first words of a language or all words of a given length (Cross Section)
- Some support for the transition semigroups of DFAs

### 1.2 Finite Languages

Special methods for finite languages are available:

- Construction of a ADFA (acyclic finite automata) from a set of words
- Minimization of ADFAs
- Several methods for ADFAs random generation

- Methods for deterministic cover finite automata (DCFA)

## 1.3 Transducers

Several methods for transducers in standard form (SFT) are available:

- Rational operations: union, inverse, reversal, composition, concatenation, star
- Test if a transducer is functional
- Input intersection and Output intersection operations

## 1.4 Codes

A *language property* is a set of languages. Given a property specified by a transducer, several language tests are possible.

- Satisfaction i.e. if a language satisfies the property
- Maximality i.e. the language satisfies the property and is maximal
- Properties implemented by transducers include: input preserving, input altering, trajectories, and fixed properties
- Computation of the edit distance of a regular language, using input altering transducers

## MODULE: FINITE AUTOMATA (FA)

### Finite automata manipulation.

Deterministic and non-deterministic automata manipulation, conversion and evaluation.

## 2.1 Class FA (abstract class for Finite Automata)

**class** `fa.FA`

Bases: `common.Drawable`

Base class for Finite Automata.

### Variables

- **States** – set of states
- **Sigma** – alphabet set
- **Initial** – the initial state
- **Final** – set of final states
- **delta** – the transition function

---

**Note:** This is just an abstract class. **Not to be used directly!!**

---

**addFinal** (*stateindex*)

A new state is added to the already defined set of final states.

**Parameters** *stateindex* (*int*) – index of the new final state

**addSigma** (*sym*)

Adds a new symbol to the alphabet.

**Parameters** *sym* (*str*) – symbol to be added

**Raises** **DFAepsilonRedefinition** if *sym* is Epsilon

---

### Note:

- There is no problem with duplicate symbols because Sigma is a Set.
  - No symbol Epsilon can be added.
- 

**addState** (*name=None*)

Adds a new state to an FA. If no name is given a new name is created.

**Parameters** *name* (*object*) – Name of the state to be added

**Returns** Current number of states (the new state index)

**Return type** `int`

**Raises DuplicateName** if a state with that name already exists

**conjunction** (*other*)

A simple literate invocation of \_\_and\_\_

**Parameters** *other* – the other FA

New in version 0.9.6.

**countTransitions** ()

Evaluates the size of FA transitionwise

**Returns** the number of transitions

**Return type** int

Changed in version 1.0.

**delFinal** (*st*)

Deletes a state from the final states list

**Parameters** *st* (*int*) – state to be marked as not final

**delFinals** ()

Deletes all the information about final states.

**deleteState** (*sti*)

Remove the given state and the transitions related with that state.

**Parameters** *sti* (*int*) – index of the state to be removed

**Raises DFAstateUnknown** if state index does not exist

**disj** (*other*)

Another simple literate invocation of \_\_or\_\_

**Parameters** *other* – the other FA

New in version 0.9.6.

**disjunction** (*other*)

A simple literate invocation of \_\_or\_\_

**Parameters** *other* – the other FA

**dotDrawState** (*sti*, *sep*='n')

Draw a state in dot format

**Parameters**

- *sti* (*int*) – index of the state
- *sep* (*str*) – separator

**Return type** str

**dotDrawTransition** (*st1*, *sym*, *st2*, *sep*)

Draw a transition in dot format

**Parameters**

- *st1* (*str*) – departing state
- *sym* (*str*) – label
- *st2* (*str*) – arriving state
- *sep* (*str*) – separator

**dotFormat** (*size*='20, 20', *direction*='LR', *sep*='n')

A dot representation

**Parameters**

- **direction** (*str*) – direction of drawing
- **size** (*str*) – size of image
- **sep** (*str*) – line separator

**Returns** the dot representation

**Return type** str

New in version 0.9.6.

Changed in version 0.9.8.

**eliminateDeadName** ()

Eliminates dead state name (common.DeadName) renaming the state

|                                 |
|---------------------------------|
| <b>Attention:</b> works inplace |
|---------------------------------|

New in version 1.2.

**equivalentP** (*other*)

Test equivalence

**Parameters** *other* – the other automata

**Return type** bool

New in version 0.9.6.

**evalSymbol** ()

Evaluation of a single symbol

**finalP** (*state*)

Tests if a state is final

**Parameters** *state* (*int*) – state index

**Return type** bool

**finalsP** (*states*)

Tests if all the states in a set are final

**Parameters** *states* (*set*) – set of state indexes

**Return type** bool

New in version 1.0.

**hasStateIndexP** (*st*)

Checks if a state index pertains to an FA

**Parameters** *st* (*int*) – index of the state

**Return type** bool

**indexList** (*lstn*)

Converts a list of stateNames into a set of stateIndexes.

**Parameters** *lstn* (*list*) – list of names

**Returns** the list of state indexes

**Return type** Set of int

**Raises DFAstateUnknown** if a state name is unknown

**initialP** (*state*)

Tests if a state is initial

**Parameters** *state* (*int*) – state index

**Return type** bool

**initialSet** ()

The set of initial states

**Returns** the set of the initial states

**Return type** set of States

**inputS** (i)

Input labels coming out of state i

**Parameters** i (*int*) – state

**Returns** set of input labels

**Return type** set of str

New in version 1.0.

**noBlankNames** ()

Eliminates blank names

**Returns** self

**Attention:** in place transformation

**plus** ()

Plus of a FA (star without the adding of epsilon)

New in version 0.9.6.

**renameState** (st, name)

Rename a given state.

**Parameters**

- st (*int*) – state index
- name (*object*) – name

**Returns** self

---

**Note:** Deals gracefully both with int and str names in the case of name collision.

---

**Attention:** the object is modified in place

**renameStates** (nameList=None)

Renames all states using a new list of names.

**Parameters** nameList (*list*) – list of new names

**Raises** **DFAerror** if provided list is too short

**Returns** self

---

**Note:** If no list of names is given, state indexes are used.

---

**Attention:** the object is modified in place

**reversal** ()

Returns a NFA that recognizes the reversal of the language

**Returns** NFA recognizing reversal language

**Return type** NFA

**same\_nullability** (s1, s2)

Tests if this two states have the same nullability

**Parameters**

- **s1** (*int*) – state index
- **s2** (*int*) – state index

**Return type** bool**setFinal** (*statelist*)

Sets the final states of the FA

**Parameters** **statelist** (*int|list|set*) – a list (or set) of final states indexes**Caution:** it erases any previous definition of the final state set.**setInitial** (*stateindex*)

Sets the initial state of a FA

**Parameters** **stateindex** (*int*) – index of the initial state**setSigma** (*symbolSet*)

Defines the alphabet for the FA.

**Parameters** **symbolSet** (*list|set*) – alphabet symbols**stateIndex** (*name, autoCreate=False*)

Index of given state name.

**Parameters**

- **name** (*object*) – name of the state
- **autoCreate** (*bool*) – flag to create state if not already done

**Returns** state index**Return type** int**Raises** **DFastateUnknown** if the state name is unknown and autoCreate==False**Note:** Replaces stateName**Note:** If the state name is not known and flag is set creates it on the fly

New in version 1.0.

**stateName** (*\*args, \*\*kwargs*)

Index of given state name.

**Parameters**

- **name** (*object*) – name of the state
- **autoCreate** (*bool*) – flag to create state if not already done

**Returns** state index**Return type** int**Raises** **DFastateUnknown** if the state name is unknown and autoCreate==FalseDeprecated since version 1.0: Use: `stateIndex()` instead**succintTransitions** ()

Collapsed transitions :rtype: list

**union** (*other*)A simple literate invocation of `__or__`**Parameters** **other** – right hand operand

**words** (*stringo=True*)  
Lexicographical word generator

**Attention:** does not generate the empty word

**Parameters** *stringo* (*bool*) – are words strings?

New in version 0.9.8.

## 2.2 Class SemiDFA (Semi-Automata class)

**class** `fa.SemiDFA`

Bases: `common.Drawable`

Class of automata without initial or final states

### Variables

- **States** – list of states
- **delta** – transition function
- **Sigma** – alphabet set

**dotDrawState** (*sti*, *sep='n'*)

Dot representation of a state

### Parameters

- **sti** (*int*) – state index
- **sep** (*str*) – separator

**Return type** `str`

**static dotDrawTransition** (*st1*, *lbl1*, *st2*, *sep='n'*)

Draw a transition in dot format

### Parameters

- **st1** (*str*) – departing state
- **lbl1** (*str*) – label
- **st2** (*str*) – arriving state
- **sep** (*str*) – separator

**Return type** `str`

**dotFormat** (*size='20, 20'*, *direction='LR'*, *sep='n'*)

Dot format of automata

### Parameters

- **size** (*str*) – image size
- **direction** – direction of drawing
- **sep** (*str*) – separator

**Return type** `str`

## 2.3 Class OFA (one-way finite automata class)

**class** `fa.OFA`

Bases: `fa.FA`

Base class for one-way automata .. inheritance-diagram:: OFA

**SPRegExp** ()

Checks if FA is SP (Serial-PARallel), and if so returns the regular expression whose language is recognised by the FA

**Returns** equivalent regular expression

**Return type** regexp

**Raises NotSP** if the automaton is not Serial-Parallel

**See also:**

Moreira & Reis, Fundamenta Informatica, Series-Parallel automata and short regular expressions, n.91 3-4, pag 611-629. <http://www.dcc.fc.up.pt/~nam/publica/spa07.pdf>

---

**Note:** Automata must be Serial-Parallel

---

**acyclicP** (*strict=True*)

Checks if the FA is acyclic

**Parameters** *strict* (*bool*) – if not True loops are allowed

**Returns** True if the FA is acyclic

**Return type** bool

**addTransition** (*st1, sym, st2*)

Add transition :param int st1: departing state :param str sym: label :param int st2: arriving state

**allRegExps** ()

Evaluates the alphabetic length of the equivalent regular expression using every possible order of state elimination.

**Return type** list of tuples (int, list of states)

**complete** (*dead='@DeaD'*)

Transforms the automata into a complete one. If Sigma is empty nothing is done.

**Parameters** *dead* (*str*) – dead state name

**Returns** the complete FA

**Return type** DFA

---

**Note:** Adds a dead state (if necessary) so that any word can be processed with the automata. The new state is named *dead*, so this name should never be used for other purposes.

---

**Attention:** The object is modified in place.

Changed in version 1.0.

**completeP** ()

Checks if it is a complete FA (if delta is total)

**Returns** bool

**cutPoints** ()

Set of FA's cut points

**Returns** set of states

**Return type** set of int

**deleteStates** (*del\_states*)

To be implemented below

**Parameters** *del\_states* (*list*) – states to be deleted

**static dotDrawTransition** (*st1*, *label*, *st2*, *sep*= 'n')

Draw a transition in Dot Format

**Parameters**

- **st1** (*str*) – starting state
- **st2** (*str*) – ending state
- **label** (*str*) – symbol
- **sep** (*str*) – separator

**Return type** str

**dump** ()

Returns a python representation of the object

**Returns** the python representation (Tags,States,Sigma,delta,Initial,Final)

**Return type** tuple

**dup** ()

Duplicate OFA

**Returns** duplicate object

**eliminateSingles** ()

Eliminates every state that only have one successor and one predecessor.

**Returns** GFA after eliminating states

**Return type** GFA

**eliminateStout** (*st*)

Eliminate all transitions outgoing from a given state

**Parameters** *st* (*int*) – the state index to loose all outgoing transitions

**Attention:** performs in place alteration of the automata

New in version 0.9.6.

**emptyP** ()

Tests if the automaton accepts a empty language

**Return type** bool

New in version 1.0.

**evalNumberOfStateCycles** ()

Evaluates the number of cycles each state participates

**Returns** state->list of cycle lengths

**Return type** dict

**evalSymbol** ()

Eval symbol

**finalCompP** (*s*)

To be implemented below

**Parameters** *s* – state

**Return type** list

**initialComp** ()

Initial component

**Return type** list

**minimalBrzozowski** ()

Constructs the equivalent minimal DFA using Brzozowski's algorithm

**Returns** equivalent minimal DFA

**Return type** DFA

**minimalBrzozowskiP** ()

Tests if the FA is minimal using Brzozowski's algorithm

**Return type** bool

**reCG** ()

Regular expression from state elimination whose language is recognised by the FA. Uses a heuristic to choose the order of elimination.

**Returns** the equivalent regular expression

**Return type** regexp

**reCG\_nn** ()

Regular expression from state elimination whose language is recognised by the FA. Uses a heuristic to choose the order of elimination. The FA is not normalized before the state elimination.

**Returns** the equivalent regular expression

**Return type** regexp

**reDynamicCycleHeuristic** ()

State elimination Heuristic based on the number of cycles that passes through each state. Here those numbers are evaluated dynamically after each elimination step

**Returns** an equivalent regular expression

**Return type** regexp

**See also:**

Nelma Moreira, Davide Nabais, and Rogério Reis. State elimination ordering strategies: Some experimental results. Proc. of 11th Workshop on Descriptive Complexity of Formal Systems (DCFS10), pages 169-180.2010. DOI: 10.4204/EPTCS.31.16

**reStaticCycleHeuristic** ()

State elimination Heuristic based on the number of cycles that passes through each state. Here those numbers are evaluated statically in the beginning of the process

**Returns** a equivalent regular expression

**Return type** regexp

**See also:**

Nelma Moreira, Davide Nabais, and Rogério Reis. State elimination ordering strategies: Some experimental results. Proc. of 11th Workshop on Descriptive Complexity of Formal Systems (DCFS10), pages 169-180.2010. DOI: 10.4204/EPTCS.31.16

**re\_stateElimination** (*order=None*)

Regular expression from state elimination whose language is recognised by the FA. The FA is normalized before the state elimination.

**Parameters** *order* (*list*) – state elimination sequence

**Returns** the equivalent regular expression

**Return type** regexp

**re\_stateElimination\_nn** (*order=None*)

Regular expression from state elimination whose language is recognised by the FA. The FA is not normalized before the state elimination.

**Parameters** **order** (*list*) – state elimination sequence

**Returns** the equivalent regular expression

**Return type** regexp

**regexpsE** ()

A regular expression obtained by state elimination algorithm whose language is recognised by the FA.

**Returns** the equivalent regular expression

**Return type** regexp

**stateChildren** (*s*)

To be implemented below

**Parameters** **s** – state

**Return type** list

**succintTransitions** ()

Collapsed transitions

**toGFA** ()

To be implemented below

**topoSort** ()

Topological order for the FA

**Returns** List of state indexes

**Return type** list of int

---

**Note:** self loops are taken in consideration

---

**trim** ()

Removes the states that do not lead to a final state, or, inclusively, that can't be reached from the initial state. Only useful states remain.

|                                           |
|-------------------------------------------|
| <b>Attention:</b> in place transformation |
|-------------------------------------------|

**trimP** ()

Tests if the FA is trim: initially connected and co-accessible

**Returns** bool

**uniqueRepr** ()

Abstract method

**usefulStates** ()

To be implemented below

## 2.4 Class DFA (Deterministic Finite Automata)

**class** `fa.DFA`

Bases: `fa.OFA`

Class for Deterministic Finite Automata.

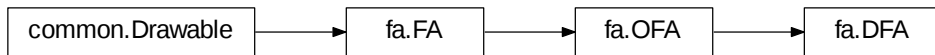

**Delta** (*state*, *symbol*)

Evaluates the action of a symbol over a state

**Parameters**

- **state** (*int*) – state index
- **symbol** – symbol

**Returns** the action of symbol over state

**Return type** `int`

**aEquiv** ()

Computes almost equivalence, used by hyperMinimal

**Returns** partition of states

**Return type** `dictionary`

---

**Note:** may be optimized to avoid dupped

---

**addTransition** (*sti1*, *sym*, *sti2*)

Adds a new transition from *sti1* to *sti2* consuming symbol *sym*.

**Parameters**

- **sti1** (*int*) – state index of departure
- **sti2** (*int*) – state index of arrival
- **sym** (*str*) – symbol consumed

**Raises DFAnotNFA** if one tries to add a non deterministic transition

**compat** (*s1*, *s2*, *data*)

Tests compatibility between two states.

**Parameters**

- **data** –
- **s1** (*int*) – state index
- **s2** (*int*) – state index

**Return type** `bool`

**completeMinimal** ()

Completes a DFA assuming it is a minimal and avoiding de destruction of its minimality If the automaton is not complete, all the non final states are checked to see if they are not already a dead state. Only in the negative case a new (dead) state is added to the automaton.

**Return type** `DFA`

**Attention:** The object is modified in place. If the alphabet is empty nothing is done

**completeProduct** (*other*)

Product structure

**Parameters** *other* – the other DFA

**computeKernel** ()

The Kernel of a IC DFA is the set of states that accept a non finite language.

**Returns** triple (comp, center, mark) where comp are the strongly connected components, center the set of center states and mark the kernel states

**Return type** tuple

**concat** (*fa2*, *strict=False*)

Concatenation of two DFAs. If DFAs are not complete, they are completed.

**Parameters**

- **strict** (*Boolean*) – should alphabets be checked?
- **fa2** (*DFA*) – the second DFA

**Returns** the result of the concatenation

**Return type** DFA

**Raises DFAdifferentSigma** if alphabet are not equal

**concatI** (*fa2*, *strict=False*)

Concatenation of two DFAs.

**Parameters**

- **fa2** (*DFA*) – the second DFA
- **strict** (*Boolean*) – should alphabets be checked?

**Returns** the result of the concatenation

**Return type** DFA

**Raises DFAdifferentSigma** if alphabet are not equal

New in version 0.9.5.

---

**Note:** this is to be used with non complete DFAs

---

**delTransition** (*sti1*, *sym*, *sti2*, *\_no\_check=False*)

Remove a transition if existing and perform cleanup on the transition function's internal data structure.

**Parameters**

- **\_no\_check** (*Boolean*) – use unsecure code?
- **sti1** (*int*) – state index of departure
- **sti2** (*int*) – state index of arrival
- **sym** (*str*) – symbol consumed

---

**Note:** Unused alphabet symbols will be discarded from Sigma.

---

**deleteStates** (*del\_states*)

Delete given iterable collection of states from the automaton.

**Parameters** *del\_states* – collection of int representing states

---

**Note:** delta function will always be rebuilt, regardless of whether the states list to remove is a suffix, or a sublist, of the automaton's states list.

---

**dist** ()

Evaluate the distinguishability language for a DFA

**Return type** DFA

**See also:**

Cezar Câmpeanu, Nelma Moreira, Rogério Reis: The distinguishability operation on regular languages. NCMA 2014: 85-100

New in version 0.9.8.

**distMin** ()

Evaluates the list of minimal words that distinguish each pair of states

**Returns** set of minimal distinguishing words

**Return type** FL

New in version 0.9.8.

**Attention:** If the DFA is not minimal, the method loops forever

**distR** ()

Evaluate the right distinguishability language for a DFA

**Return type** DFA

**..seealso::** Cezar Câmpeanu, Nelma Moreira, Rogério Reis: The distinguishability operation on regular languages. NCMA 2014: 85-100

**distRMin** ()

Compute distRMin for DFA

:rtype FL

**..seealso::** Cezar Câmpeanu, Nelma Moreira, Rogério Reis: The distinguishability operation on regular languages. NCMA 2014: 85-100

**distTS** ()

Evaluate the two-sided distinguishability language for a DFA

**Return type** DFA

**..seealso::** Cezar Câmpeanu, Nelma Moreira, Rogério Reis: The distinguishability operation on regular languages. NCMA 2014: 85-100

**dup** ()

Duplicate the basic structure into a new DFA. Basically a copy.deep.

**Return type** DFA

**enumDFA** (*n=None*)

returns the set of words of words of length up to n accepted by self :param n: highest length or all words if finite :type n: int

**Return type** list of strings or None

**equal** (*other*)

Verify if the two automata are equivalent. Both are verified to be minimum and complete, and then one is matched against the other... Doesn't destroy either dfa...

**Parameters** *other* (DFA) – the other DFA

**Return type** bool

**evalSymbol** (*init, sym*)

Returns the state reached from given state through a given symbol.

**Parameters**

- **init** (*set or list of int*) – set of current states indexes
- **sym** (*str*) – symbol to be consumed

**Returns** reached state

**Return type** int

**Raises**

- **DFAsymbolUnknown** – if symbol not in alphabet
- **DFAstopped** – if transition function is not defined for the given input

**evalSymbolI** (*init, sym*)

Returns the state reached from a given state.

**Parameters**

- **init** (*int*) – current state
- **sym** (*str*) – symbol to be consumed

**Returns** reached state or -1

**Return type** set of int

**Raises DFAsymbolUnknown** if symbol not in alphabet

New in version 0.9.5.

---

**Note:** this is to be used with non complete DFAs

---

**evalSymbolL** (*ls, sym*)

Returns the set of states reached from a given set of states through a given symbol

**Parameters**

- **ls** (*set of int*) – set of states indexes
- **sym** (*str*) – symbol to be read

**Returns** set of reached states

**Return type** set of int

**evalSymbolLI** (*ls, sym*)

Returns the set of states reached from a given set of states through a given symbol

**Parameters**

- **ls** (*set of int*) – set of current states
- **sym** (*str*) – symbol to be consumed

**Returns** set of reached states

**Return type** set of int

New in version 0.9.5.

---

**Note:** this is to be used with non complete DFAs

---

**evalWordP** (*word, initial=None*)

Verifies if the DFA recognises a given word

**Parameters**

- **word** (*list of symbols.*) – word to be recognised
- **initial** (*int*) – starting state index

**Return type** bool

**finalCompP** (*s*)

Verifies if there is a final state in strongly connected component containing *s*.

**Parameters** *s* (*int*) – state

**Returns** 1 if yes, 0 if no

**hasTrapStateP** ()

Tests if the automaton has a dead trap state

**Return type** bool

New in version 1.1.

**hyperMinimal** (*strict=False*)

Hyperminimization of a minimal DFA

**Parameters** *strict* (*bool*) – if *strict=True* it first minimizes the DFA

**Returns** an hyperminimal DFA

**Return type** DFA

**See also:**

M. Holzer and A. Maletti, An nlogn Algorithm for Hyper-Minimizing a (Minimized) Deterministic Automata, TCS 411(38-39): 3404-3413 (2010)

---

**Note:** if *strict=False* minimality is assumed

---

**inDegree** (*st*)

Returns the in-degree of a given state in an FA

**Parameters** *st* (*int*) – index of the state

**Return type** int

**infix** ()

Returns a dfa that recognizes infix(L(a))

**Return type** DFA

**initialComp** ()

Evaluates the connected component starting at the initial state.

**Returns** list of state indexes in the component

**Return type** list of int

**initialP** (*state*)

Tests if a state is initial

**Parameters** *state* (*int*) – state index

**Return type** bool

**initialSet** ()

The set of initial states

**Returns** the set of the initial states

**Return type** set of States

**joinStates** (*lst*)

Merge a list of states.

**Parameters** *lst* (*iterable of state indexes.*) – set of equivalent states

**markNonEquivalent** (*s1, s2, data*)

Mark states with indexes *s1* and *s2* in given map as non equivalent states. If any back-effects exist, apply them.

**Parameters**

- **s1** (*int*) – one state's index
- **s2** (*int*) – the other state's index
- **data** – the matrix relating s1 and s2

**mergeStates** (*f, t*)

Merge the first given state into the second. If the first state is an initial state the second becomes the initial state.

**Parameters**

- **f** (*int*) – index of state to be absorbed
- **t** (*int*) – index of remaining state

**Attention:** It is up to the caller to remove the disconnected state. This can be achieved with `'trim()'.`

**minimal** (*method='minimalHopcroft', complete=True*)

Evaluates the equivalent minimal complete DFA

**Parameters**

- **method** – method to use in the minimization
- **complete** (*bool*) – should the result be completed?

**Returns** equivalent minimal DFA**Return type** DFA**minimalHKP** ()

Tests the DFA's minimality using Hopcroft and Karp's state equivalence algorithm

**Returns** bool**See also:**

J. E. Hopcroft and R. M. Karp. A Linear Algorithm for Testing Equivalence of Finite Automata. TR 71-114. U. California. 1971

**Attention:** The automaton must be complete.

**minimalHopcroft** ()

Evaluates the equivalent minimal complete DFA using Hopcroft algorithm

**Returns** equivalent minimal DFA**Return type** DFA**See also:**

John Hopcroft, An  $n \log \{n\}$  algorithm for minimizing states in a finite automaton. The Theory of Machines and Computations. AP. 1971

**minimalHopcroftP** ()

Tests if a DFA is minimal

**Return type** bool**minimalIncremental** (*minimal\_test=False*)

Minimizes the DFA with an incremental method using the Union-Find algorithm and memoized non-equivalence intermediate results

**Parameters** **minimal\_test** (*bool*) – starts by verifying that the automaton is not minimal?**Returns** equivalent minimal DFA

**Return type** DFA

**See also:**

13.Almeida and N. Moreira and and R. Reis.Incremental DFA minimisation. CIAA 2010. LNCS 6482. pp 39-48. 2010

**minimalIncrementalP** ()

Tests if a DFA is minimal

**Return type** bool

**minimalMoore** ()

Evaluates the equivalent minimal automata with Moore's algorithm

**See also:**

John E. Hopcroft and Jeffrey D. Ullman, Introduction to Automata Theory, Languages, and Computation, AW, 1979

**Returns** minimal complete DFA

**Return type** DFA

**minimalMooreSq** ()

Evaluates the equivalent minimal complete DFA using Moore's (quadratic) algorithm

**See also:**

John E. Hopcroft and Jeffrey D. Ullman, Introduction to Automata Theory, Languages, and Computation, AW, 1979

**Returns** equivalent minimal DFA

**Return type** DFA

**minimalMooreSqP** ()

Tests if a DFA is minimal using the quadratic version of Moore's algorithm

**Return type** bool

**minimalNCompleteP** ()

Tests if a non necessarily complete DFA is minimal, i.e., if the DFA is non complete, if the minimal complete has only one more state.

**Returns** True if not minimal

**Return type** bool

|                                          |
|------------------------------------------|
| <b>Attention:</b> obsolete: use minimalP |
|------------------------------------------|

**minimalNotEquivP** ()

Tests if the DFA is minimal by computing the set of distinguishable (not equivalent) pairs of states

**Return type** bool

**minimalP** (*method*='minimalHopcroft')

Tests if the DFA is minimal

**Parameters** **method** – the minimization algorithm to be used

**Return type** bool

..note: if DFA non complete test if complete minimal has one more state

**minimalWatson** (*test\_only=False*)

Evaluates the equivalent minimal complete DFA using Waton's incremental algorithm

**Parameters** `test_only` (*bool*) – is it only to test minimality

**Returns** equivalent minimal DFA

**Return type** DFA

**Raises** `DFAnotComplete` if automaton is not complete

**..attention::** automaton must be complete

**minimalWatsonP** ()

Tests if a DFA is minimal using Watson's incremental algorithm

**Return type** bool

**notequal** (*other*)

Test non equivalence of two DFAs

**Parameters** `other` (*DFA*) – the other DFA

**Return type** bool

**pairGraph** ()

Returns pair graph

**Return type** DiGraphVM

**See also:**

A graph theoretic approach to automata minimality. Antonio Restivo and Roberto Vaglica. Theoretical Computer Science, 429 (2012) 282-291. doi:10.1016/j.tcs.2011.12.049 Theoretical Computer Science, 2012 vol. 429 (C) pp. 282-291. <http://dx.doi.org/10.1016/j.tcs.2011.12.049>

**pref** ()

Returns a dfa that recognizes `pref(L(self))`

**Return type** DFA

New in version 1.1.

**print\_data** (*data*)

Prints table of compatibility (in the context of the minimalization algorithm).

**Parameters** `data` – data to print

**product** (*other*, *complete=True*)

Returns a DFA resulting of the simultaneous execution of two DFA. No final states set.

**Parameters**

- `other` – the other DFA
- `complete` (*bool*) – evaluate product as a complete DFA

**Return type** DFA

**regexp** ()

Returns a regexp for the current DFA considering the recursive method. Very inefficient.

**Returns** a regexp equivalent to the current DFA

**Return type** regexp

**reorder** (*dicti*)

Reorders states according to given dictionary. Given a dictionary (not necessarily complete)... reorders states accordingly.

:param dicti :type dicti: dictionary

**reverseTransitions** (*rev*)

Evaluate reverse transition function.

**Parameters** `rev (DFA)` – DFA in which the reverse function will be stored

**sMonoid** ()

Evaluation of the syntactic monoid of a DFA

**Returns** the semigroup

**Return type** SSemiGroup

**sSemigroup** ()

Evaluation of the syntactic semigroup of a DFA

**Returns** the semigroup

**Return type** SSemiGroup

**shuffle** (*other*, *strict=False*)

Shuffle of two languages: L1 W L2

**Parameters**

- **other** (*DFA*) – second automaton
- **strict** (*bool*) – should the alphabets be necessary equal?

**Return type** DFA

**See also:**

C. Câmpeanu, K. Salomaa and S. Yu, *Tight lower bound for the state complexity of shuffle of regular languages*. J. Autom. Lang. Comb. 7 (2002) 303–310.

**simDiff** (*other*)

Symetrical difference

**Parameters** **other** –

**Returns**

**sop** (*other*)

Strange operation

**Parameters** **other** (*DFA*) – the other automaton

**Return type** DFA

New in version 1.2b2.

**star** (*flag=False*)

Star of a DFA. If the DFA is not complete, it is completed.

..versionchanged: 0.9.6

**Parameters** **flag** (*bool*) – plus instead of star

**Returns** the result of the star

**Return type** DFA

**starI** ()

Star of an incomplete DFA.

**Returns** the Kleene closure DFA

**Return type** DFA

**stateChildren** (*state*, *strict=False*)

Set of children of a state

**Parameters**

- **strict** (*bool*) – if not strict a state is never its own child even if a self loop is in place
- **state** (*int*) – state id queried

**Returns** map children -> multiplicity

**Return type** dictionary

**subword** ()

Returns a dfa that recognizes subword(L(self))

**Return type** dfa

New in version 1.1.

**succintTransitions** ()

Collects the transition information in a compact way suitable for graphical representation. :rtype: list of tuples

New in version 0.9.8.

**suff** ()

Returns a dfa that recognizes suff(L(self))

**Return type** DFA

New in version 0.9.8.

**syncPower** ()

Evaluates the power automata for the action of each symbol

**Returns** The power automata being the set of all states the initial state and all singleton states final.

**Return type** DFA

**syncWords** ()

Evaluates the regular expression corresponding to the synchronizing pwords of the automata.

**Returns** a regular expression of the sync words of the automata

**Return type** regexp

**toADFA** ()

Try to convert DFA to ADFA

**Returns** the same automaton as a ADFA

**Return type** ADFA

**Raises notAcyclic** if this is not an acyclic DFA

New in version 1.2.

**toDFA** ()

Dummy function. It is already a DFA

**Returns** a self deep copy

**Return type** DFA

**toGFA** ()

Creates a GFA equivalent to DFA

**Returns** GFA deep copy

**Return type** GFA

**toNFA** ()

Migrates a DFA to a NFA as dup()

**Returns** DFA seen as new NFA

**Return type** NFA

**uniqueRepr** ()

Normalise unique string for the string icdfa's representation.

**See also:**

TCS 387(2):93-102, 2007 <http://www.ncc.up.pt/~nam/publica/tcsamr06.pdf>

**Returns** normalised representation

**Return type** list

**Raises DFAnotComplete** if DFA is not complete

**unmark** ()

Unmarked NFA that corresponds to a marked DFA: in which each alfabetetic symbol is a tuple (symbol, index)

**Returns** a NFA

**Return type** NFA

**usefulStates** (*initial\_states=None*)

Set of states reacheable from the given initial state(s) that have a path to a final state.

**Parameters** **initial\_states** (*iterable of int*) – starting states

**Returns** set of state indexes

**Return type** set of int

**static vDescription** ()

Generation of Verso interface description

New in version 0.9.5.

**Returns** the interface list

**witness** ()

Witness of non emptyness

**Returns** word

**Return type** str

**witnessDiff** (*other*)

Returns a witness for the difference of two DFAs and:

|   |                                                     |
|---|-----------------------------------------------------|
| 0 | if the witness belongs to the <b>other</b> language |
| 1 | if the witness belongs to the <b>self</b> language  |

**Parameters** **other** (*DFA*) – the other DFA

**Returns** a witness word

**Return type** list of symbols

**Raises DFAequivalent** if automata are equivalent

## 2.5 Class NFA (Nondeterministic Finite Automata)

**class** `fa.NFA`

Bases: `fa.OFA`

Class for Non-deterministic Finite Automata (epsilon-transitions allowed).

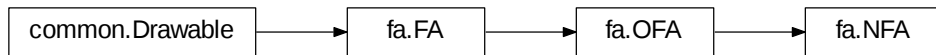

#### **addEpsilonLoops ()**

Add epsilon loops to every state :return: self

**Attention:** in-place modification

New in version 1.0.

#### **addInitial (stateindex)**

Add a new state to the set of initial states.

**Parameters** *stateindex* (*int*) – index of new initial state

#### **addTransition (sti1, sym, sti2)**

Adds a new transition. Transition is from *sti1* to *sti2* consuming symbol *sym*. *sti2* is a unique state, not a set of them.

##### **Parameters**

- **sti1** (*int*) – state index of departure
- **sti2** (*int*) – state index of arrival
- **sym** (*str*) – symbol consumed

#### **addTransitionQ (srcI, dest, symb, qfuture, qpast)**

Add transition to the new transducer instance.

##### **Parameters**

- **qpast** (*set*) – past queue
- **qfuture** (*set*) – future queue
- **symb** – symbol
- **dest** – destination state
- **srcI** (*int*) – source state

New in version 1.0.

#### **autobisimulation ()**

Largest right invariant equivalence between states of the NFA

**Returns** Incomplete equivalence relation (transitivity, and reflexivity not calculated) as a set of unordered pairs of states

**Return type** Set of frozensets

**See also:**

Ilie&Yu, 2003

#### **autobisimulation2 ()**

Alternative space-efficient definition of NFA.autobisimulation.

**Returns** Incomplete equivalence relation (reflexivity, symmetry, and transitivity not calculated) as a set of pairs of states

**Return type** list of tuples

**closeEpsilon** (*st*)

Add all non epsilon transitions from the states in the epsilon closure of given state to given state.

**Parameters** *st* (*int*) – state index

**concat** (*other, middle='middle'*)

Concatenation of NFA

**Parameters**

- **middle** (*str*) – glue state name
- **other** (*NFA|DFA*) – the other NFA

**Returns** the result of the concatenation

**Return type** NFA

**countTransitions** ()

Number of transitions of a NFA

**Return type** int

**delTransition** (*sti1, sym, sti2, \_no\_check=False*)

Remove a transition if existing and perform cleanup on the transition function's internal data structure.

**Parameters**

- **sti1** (*int*) – state index of departure
- **sti2** (*int*) – state index of arrival
- **sym** (*str*) – symbol consumed
- **\_no\_check** (*bool*) – dismiss secure code

---

**Note:** unused alphabet symbols will be discarded from Sigma.

---

**deleteStates** (*del\_states*)

Delete given iterable collection of states from the automaton.

**Parameters** *del\_states* (*set|list*) – collection of int representing states

---

**Note:** delta function will always be rebuilt, regardless of whether the states list to remove is a suffix, or a sublist, of the automaton's states list.

---

**deterministicP** ()

Verify whether this NFA is actually deterministic

**Return type** bool

**dotFormat** (*size='20, 20', direction='LR', sep='n'*)

A dot representation :arg direction: direction of drawing :arg size: size of image :arg sep: line separator  
:return: the dot representation type sep: str :type direction: str :type size: str :rtype: str

New in version 0.9.6.

Changed in version 0.9.8.

**dup** ()

Duplicate the basic structure into a new NFA. Basically a copy.deep.

**Return type** NFA

**elimEpsilon** ()

Eliminate epsilon-transitions from this automaton.

:rtype : NFA

**Attention:** performs in place modification of automaton

Changed in version 1.1.1.

**eliminateEpsilonTransitions** ()

Eliminates all epsilon-transitions with no state addition

**Attention:** in-place modification

**eliminateTSymbol** (*symbol*)

Delete all transitions through a given symbol

**Parameters** *symbol* (*str*) – the symbol to be excluded from delta

**Attention:** in place alteration of the automata

New in version 0.9.6.

**enumNFA** (*n=None*)

returns the set of words of words of length up to *n* accepted by self ;param *n*: highest length or all words if finite ;type *n*: int

**Return type** list of strings or None

**epsilonClosure** (*st*)

Returns the set of states epsilon-connected to from given state or set of states.

**Parameters** *st* (*int|set*) – state index or set of state indexes

**Returns** the list of state indexes epsilon connected to *st*

**Return type** set of int

**Attention:** *st* must exist.

**epsilonP** ()

Whether this NFA has epsilon-transitions

**Return type** bool

**epsilonPaths** (*start, end*)

All states in all paths (DFS) through empty words from a given starting state to a given ending state.

**Parameters**

- **start** (*int*) – start state
- **end** (*int*) – end state

**Returns** states in epsilon paths from start to end

**Return type** set of states

**equivReduced** (*equiv\_classes*)

Equivalent NFA reduced according to given equivalence classes.

**Parameters** *equiv\_classes* (*UnionFind*) – Equivalence classes

**Returns** Equivalent NFA

**Return type** NFA

**evalSymbol** (*stil, sym*)

Set of states reachable from given states through given symbol and epsilon closure.

**Parameters**

- **stil** (*setl*) – set of current states
- **sym** (*str*) – symbol to be consumed

**Returns** set of reached state indexes

**Return type** set[int]

**Raises** **DFASymbolUnknown** if symbol is not in alphabet

**evalWordP** (*word*)

Verify if the NFA recognises given word.

**Parameters** **word** (*str*) – word to be recognised

**Return type** bool

**finalCompP** (*s*)

Verify whether there is a final state in strongly connected component containing given state.

**Parameters** **s** (*int*) – state index

**Returns** :: bool

**half** ()

Half operation

New in version 0.9.6.

**hasTransitionP** (*state*, *symbol=None*, *target=None*)

Whether there's a transition from given state, optionally through given symbol, and optionally to a specific target.

**Parameters**

- **state** (*int*) – source state
- **symbol** (*str*) – optional transition symbol
- **target** (*int*) – optional target state

**Returns** if there is a transition

**Return type** bool

**homogenousP** (*x*)

Whether this NFA is homogenous; that is, for all states, whether all incoming transitions to that state are through the same symbol.

**Parameters** **x** – dummy parameter to agree with the method in DFAR

**Return type** bool

**initialComp** ()

Evaluate the connected component starting at the initial state.

**Returns** list of state indexes in the component

**Return type** list of int

**lEquivNFA** ()

Equivalent NFA obtained from merging equivalent states from autobisimulation of this NFA's reversal.

**Return type** NFA

---

**Note:** returns copy of self if autobisimulation renders no equivalent states.

---

**lrEquivNFA** ()

Equivalent NFA obtained from merging equivalent states from autobisimulation of this NFA, and from autobisimulation of its reversal; i.e., merges all states that are equivalent w.r.t. the largest right invariant and largest left invariant equivalence relations.

**Return type** NFA

---

**Note:** returns copy of self if autobisimulations render no equivalent states.

---

**minimal** ()

Evaluates the equivalent minimal DFA

**Returns** equivalent minimal DFA

**Return type** DFA

**minimalDFA** ()

Evaluates the equivalent minimal complete DFA

**Returns** equivalent minimal DFA

**Return type** DFA

**product** (*other*)

Returns a NFA (skeleton) resulting of the simultaneous execution of two DFA.

**Parameters** *other* (NFA) – the other automata

**Return type** NFA

---

**Note:** No final states are set.

---

**Attention:**

- the name `EmptySet` is used in a unique special state name
- the method uses 3 internal functions for simplicity of code (really!)

**rEquivNFA** ()

Equivalent NFA obtained from merging equivalent states from autobisimulation of this NFA.

**Return type** NFA

---

**Note:** returns copy of self if autobisimulation renders no equivalent states.

---

**reorder** (*dicti*)

Reorder states indexes according to given dictionary.

**Parameters** *dicti* (*dictionary*) – state name reorder

---

**Note:** dictionary does not have to be complete

---

**reversal** ()

Returns a NFA that recognizes the reversal of the language

**Returns** NFA recognizing reversal language

**Return type** NFA

**reverseTransitions** (*rev*)

Evaluate reverse transition function.

**Parameters** *rev* (NFA) – NFA in which the reverse function will be stored

**setInitial** (*statelist*)

Sets the initial states of an NFA

**Parameters** *statelist* (*set|list|int*) – an iterable of initial state indexes

**shuffle** (*other*)

Shuffle of a NFA

**Parameters** *other* (FA) – an FA

**Returns** the resulting NFA

**Return type** NFA

**star** (*flag=False*)

Kleene star of a NFA

**Parameters** **flag** (*Boolean*) – plus instead of star

**Returns** the resulting NFA

**Return type** NFA

**stateChildren** (*state, strict=False*)

Set of children of a state

**Parameters**

- **strict** (*bool*) – if not strict a state is never its own child even if a self loop is in place
- **state** (*int*) – state id queried

**Returns** children states

**Return type** Set of int

**stronglyConnectedComponents** ()

Strong components

**Return type** list

New in version 1.0.

**subword** ()

returns a nfa that recognizes subword(L(self))

**Return type** nfa

**succinctTransitions** ()

Collects the transition information in a concat way suitable for graphical representation. :rtype: list

**toDFA** ()

Construct a DFA equivalent to this NFA, by the subset construction method.

**Return type** DFA

---

**Note:** valid to epsilon-NFA

---

**toGFA** ()

Creates a GFA equivalent to NFA

**Returns** a GFA deep copy

**Return type** GFA

**toNFA** ()

Dummy identity function

**Return type** NFA

**toNFAr** ()

NFA with the reverse mapping of the delta function.

**Returns** shallow copy with reverse delta function added

**Return type** NFAr

**uniqueRepr** ()

Dummy representation. Used DFA.uniqueRepr() :rtype: tuple

**usefulStates** (*initial\_states=None*)

Set of states reachable from the given initial state(s) that have a path to a final state.

**Parameters** `initial_states` (*set of int or list of int*) – set of initial states

**Returns** set of state indexes

**Return type** set of int

**static** `vDescription()`

Generation of Verso interface description

New in version 0.9.5.

**Returns** the interface list

**witness()**

Witness of non emptiness

**Returns** word

**Return type** str

**wordImage** (`word`, `ist=None`)

Evaluates the set of states reached consuming given word

**Parameters**

- **word** (*list of strings*) – the word
- **ist** (*int*) – starting state index (or set of)

**Returns** the set of ending states

**Return type** Set of int

## 2.6 Class NFAr (Nondeterministic Finite Automata w/ reverse transition f.)

**class** `fa.NFAr`

Bases: `fa.NFA`

Class for Non-deterministic Finite Automata with reverse delta function added by construction.

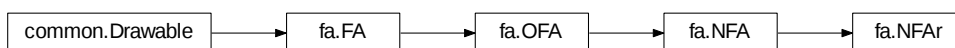

**Variables** `deltaReverse` – the reversed transition function

---

**Note:** Includes efficient methods for merging states.

---

**addTransition** (`sti1`, `sym`, `sti2`)

Adds a new transition. Transition is from `sti1` to `sti2` consuming symbol `sym`. `sti2` is a unique state, not a set of them. Reversed transition function is also computed

**Parameters**

- **sti1** (*int*) – state index of departure
- **sti2** (*int*) – state index of arrival
- **sym** (*str*) – symbol consumed

**delTransition** (*sti1, sym, sti2, \_no\_check=False*)

Remove a transition if existing and perform cleanup on the transition function's internal data structure and in the reversal transition function

**Parameters**

- **sti1** (*int*) – state index of departure
- **sti2** (*int*) – state index of arrival
- **sym** (*str*) – symbol consumed
- **\_no\_check** (*bool*) – dismiss secure code

**deleteStates** (*del\_states*)

Delete given iterable collection of states from the automaton. Performe deletion in the transition function and its reversal.

**Parameters** **del\_states** (*set or list of int*) – collection of int representing states

**elimEpsilonO** ()

Eliminate epsilon-transitions from this automaton, with reduction of states through elimination of epsilon-cycles, and single epsilon-transition cases.

**Returns** itself

**Return type** bool

**Attention:** performs inplace modification of automaton

**homogenousP** (*inplace=False*)

Checks is the automaton is homogenous, i.e.the transitions that reaches a state have all the same label.

**Parameters** **inplace** (*bool*) – if True performs epsilon transitions elimination

**Returns** True if homogenous

**Return type** bool

**mergeStates** (*f, t*)

Merge the first given state into the second. If first state is an initial or final state, the second becomes respectively an initial or final state.

**Parameters**

- **f** (*int*) – index of state to be absorbed
- **t** (*int*) – index of remaining state

**Attention:** It is up to the caller to remove the disconnected state. This can be achieved with `trim()`.

**mergeStatesSet** (*tomerge, target=None*)

Merge a set of states with a target merge state. If the states in the set have transitions among them, those transitions will be directly merged into the target state.

**Parameters**

- **tomerge** (*Set of integers*) – set of states to merge with target
- **target** (*int*) – optional target state

**Note:** if target state is not given, the minimal index with be considered.

**Attention:** The states of the list will become unreachable, but won't be removed. It is up to the caller to remove them. That can be achieved with `trim()`.

**toNFA()**

Turn into an instance of NFA, and remove the reverse mapping of the delta function.

**Returns** shallow copy without reverse delta function

**Return type** NFA

**unlinkSoleIncoming** (*state*)

If given state has only one incoming transition (indegree is one), and it's through epsilon, then remove such transition and return the source state.

**Parameters** *state* (*int*) – state to check

**Returns** source state

**Return type** int or None

---

**Note:** if conditions aren't met, returned source state is None, and automaton remains unmodified.

---

**unlinkSoleOutgoing** (*state*)

If given state has only one outgoing transition (outdegree is one), and it's through epsilon, then remove such transition and return the target state.

**Parameters** *state* (*int*) – state to check

**Returns** target state

**Return type** int or None

---

**Note:** if conditions aren't met, returned target state is None, and automaton remains unmodified.

---

## 2.7 Class GFA (Generalized Finite Automata)

**class** `fa.GFA`

Bases: `fa.OFA`

Class for Generalized Finite Automata: NFA with a unique initial state and transitions are labeled with regexp.

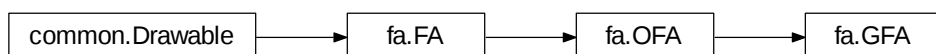

**DFS** (*io*)

Depth first search

**Parameters** *io* –

**addTransition** (*sti1*, *sym*, *sti2*)

Adds a new transition from *sti1* to *sti2* consuming symbol *sym*. Label of the transition function is a regexp.

**Parameters**

- *sti1* (*int*) – state index of departure
- *sti2* (*int*) – state index of arrival
- *sym* (*str*) – symbol consumed

**Raises DFAepsilonRedefinition** if sym is Epsilon

**assignLow** (*st*)

**Parameters** *st* –

**assignNum** (*st*)

**Parameters** *st* –

**completeDelta** ()

Adds empty set transitions between the automaton's final and initial states in order to make it complete. It's only meant to be used in the final stage of SEA...

**deleteState** (*sti*)

deletes a state from the GFA :param sti:

**dfs\_visit** (*s, visited, io*)

**Parameters**

- *s* – state
- **visited** – list of states visited
- *io* –

**dup** ()

Returns a copy of a GFA

**Return type** GFA

**eliminate** (*st*)

Eliminate a state.

**Parameters** *st* (*int*) – state to be eliminated

**eliminateAll** (*lr*)

Eliminate a list of states.

**Parameters** *lr* (*list*) – list of states indexes

**eliminateState** (*st*)

Deletes a state and updates the automaton

**Parameters** *st* (*state index*) – the state to be deleted

**normalize** ()

Create a single initial and final state with Epsilon transitions.

**Attention:** works in place

**reorder** (*dictio*)

Reorder states indexes according to given dictionary.

**Parameters** *dictio* (*dictionary*) – order

---

**Note:** dictionary does not have to be complete

---

**stateChildren** (*state, strict=False*)

Set of children of a state

**Parameters**

- **strict** (*bool*) – a state is never its own children even if a self loop is in place
- **state** (*int*) – state id queried

**Returns** map: children -> alphabetic length

**Return type** dictionary

**weight** (*state*)

Calculates the weight of a state based on a heuristic

**Parameters** *state* (*int*) – state

**Returns** the weight of the state

**Return type** int

**weightWithCycles** (*state*, *cycles*)

**Parameters**

- *state* –
- *cycles* –

**Returns**

## 2.8 Class SSemiGroup (Syntactic SemiGroup)

**class** `fa.SSemiGroup`

Bases: `object`

Class support for the Syntactic SemiGroup.

**Variables**

- **elements** – list of tuples representing the transformations
- **words** – a list of pairs (index of the prefix transformation, index of the suffix char)
- **gen** – a list of the max index of each generation
- **Sigma** – set of symbols

**WordI** (*i*)

Representative of an element given as index

**Parameters** *i* (*int*) – index of the element

**Returns** the first word originating the element

**Return type** str

**WordPS** (*pref*, *sym*)

Representative of an element given as prefix symb

**Parameters**

- **pref** (*int*) – prefix index
- **sym** (*int*) – symbol index

**Returns** word

**Return type** str

**add** (*tr*, *pref*, *sym*, *tmpLists*)

Try to add a new transformation to the monoid

**Parameters**

- **tr** (*tuple of int*) – transformation
- **pref** (*int or None*) – prefix of the generating word
- **sym** (*int*) – suffix symbol
- **tmpLists** (*pairs of lists as (elements, words)*) – this generation lists

**addGen** (*tmpLists*)

Add a new generation to the monoid

**Parameters** *tmpLists* (pair of lists as (*elements*, *words*)) – the new generation data

## 2.9 Class EnumL (Language Enumeration)

**class** `fa.EnumL` (*aut*, *store=False*)

Bases: `object`

Class for enumerate FA languages

### Variables

- **aut** – Automaton of the language
- **tmin** – table for minimal words for each *s* in `aut.States`
- **Words** – list of words (if stored)
- **Sigma** – alphabet

New in version 0.9.8.

### See also:

Efficient enumeration of words in regular languages, M. Ackerman and J. Shallit, Theor. Comput. Sci. 410, 37, pp 3461-3470. 2009. <http://dx.doi.org/10.1016/j.tcs.2009.03.018>

**enum** (*m*)

Enumerates the first *m* words of  $L(A)$  according to the lexicographic order if there are at least *m* words. Otherwise, enumerates all words accepted by *A*.

**Parameters** *m* (*int*) –

**enumCrossSection** (*n*)

Enumerates the *n*th cross-section of  $L(A)$

**Parameters** *n* (*int*) – nonnegative integer

**fillStack** (*w*)

Abstract method :param *w*: :type *w*: str

**iCompleteP** (*i*, *q*)

Tests if state *q* is *i*-complete

### Parameters

- *i* (*int*) – int
- *q* (*int*) – state index

**initStack** ()

Abstract method

**minWord** (*m*)

Computes the minimal word of length *m* accepted by the automaton :param *m*: :type *m*: int

**minWordT** (*n*)

Abstract method :param *n*: :type *n*: int

**nextWord** (*w*)

Abstract method :param *w*: :type *w*: str

## 2.10 Functions

`fa.saveToString(aut, sep='&')`

Finite automata definition as a string using the input format.

New in version 0.9.5.

Changed in version 0.9.6: Names are now used instead of indexes.

Changed in version 0.9.7: New format with quotes and alphabet

### Parameters

- **aut** (*FA*) – the FA
- **sep** (*str*) – separation between *lines*

**Returns** the representation

**Return type** `str`

`fa.stringToDFA(s, f, n, k)`

Converts a string icdfa's representation to dfa.

### Parameters

- **s** (*list*) – canonical string representation
- **f** (*list*) – bit map of final states
- **n** (*int*) – number of states
- **k** (*int*) – number of symbols

**Returns** a complete dfa with Sigma [*k*], States [*n*]

**Return type** DFA

Changed in version 0.9.8: symbols are converted to str

## MODULE: COMMON DEFINITIONS (“COMMON”)

Common definitions for FAdo files

### 3.1 Class Word

**class** `common.Word` (*it*=[])  
Bases: `object`

Class to implement generic words as iterables with pretty-print

Basically a unified way to deal with words with characters of of sizes different of one with no much fuss



## MODULE: FADO IO FUNCTIONS (“FIO”)

**In/Out.**

FAdo IO.

### 4.1 Class ParserFAdo (Yappy parser for FAdo FA files)

```
class fio.ParserFAdo (no_table=1, table='tableFAdo')
    Bases: yappy_parser.Yappy
    A parser for FAdo standard automata descriptions
```

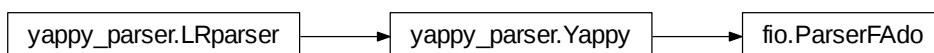

### 4.2 Functions

`fio.readFromFile (FileName)`

Reads list of finite automata definition from a file.

**Parameters** `FileName` (*str*) – file name

**Return type** list

The format of these files must be the as simple as possible:

- # begins a comment
- @DFA or @NFA begin a new automata (and determines its type) and must be followed by the list of the final states separated by blanks
- fields are separated by a blank and transitions by a CR: `state symbol new state`
- in case of a NFA declaration, the “symbol” @epsilon is interpreted as a epsilon-transition
- the source state of the first transition is the initial state
- in the case of a NFA, its declaration @NFA can, after the declaration of the final states, have a \* followed by the list of initial states
- both, NFA and DFA, may have a declaration of alphabet starting with a \$ followed by the symbols of the alphabet
- a line with a sigle name, decrares a state

```
FAdo      ::=  FA | FA CR FAdo
FA         ::=  DFA | NFA | Transducer
```

```

DFA      ::=  "@DFA" LsStates Alphabet CR dTrans
NFA      ::=  "@NFA" LsStates Initials Alphabet CR nTrans
Transducer ::=  "@Transducer" LsStates Initials Alphabet Output CR tTrans
Initials  ::=  "*" LsStates | \epsilon
Alphabet  ::=  "$" LsSymbols | \epsilon
Output    ::=  "$" LsSymbols | \epsilon
nSymbol   ::=  symbol | "@epsilon"
LsStates  ::=  stateid | stateid , LsStates
LsSymbols ::=  symbol | symbol , LsSymbols
dTrans    ::=  stateid symbol stateid |
               | stateid symbol stateid CR dTrans
nTrans    ::=  stateid nSymbol stateid |
               | stateid nSymbol stateid CR nTrans
tTrans    ::=  stateid nSymbol nSymbol stateid |
               | stateid nSymbol nSymbol stateid CR nTrans

```

---

**Note:** If an error occur, either syntactic or because of a violation of the declared automata type, an exception is raised

---

Changed in version 0.9.6.

Changed in version 1.0.

`fio.saveToFile` (*FileName*, *fa*, *mode*='a')

Saves a list finite automata definition to a file using the input format

Changed in version 0.9.5.

Changed in version 0.9.6.

Changed in version 0.9.7: New format with quotes and alphabet

#### Parameters

- **FileName** (*str*) – file name
- **fa** (*list of FA*) – the FA
- **mode** (*str*) – writing mode

## MODULE: REGULAR EXPRESSIONS (REEX)

### Regular expressions manipulation

Regular expression classes and manipulation

### 5.1 Class `regexp` (regular expression)

`class reex.regexp (val, sigma=None)`

Bases: `object`

Base class for regular expressions.

Used directly to represent a symbol. The type of the symbol is arbitrary.

#### Variables

- **Sigma** – alphabet set of strings
- **val** – the actual symbol

`reex.regexp`

Constructor of a regular expression symbol.

**Parameters** **val** – the actual symbol

**PD** ()

Closure of partial derivatives of the regular expression in relation to all words.

**Returns** set of regular expressions

**Return type** set

**See also:**

Antimirov, 95

**alphabeticLength** ()

Number of occurrences of alphabet symbols in the regular expression.

**Return type** integer

**Attention:** Doesn't include the empty word.

**compare** (*r*, *cmp\_method*=*'compareMinimalDFA'*, *nfa\_method*=*'nfaPosition'*)

Compare with another regular expression for equivalence. :param r: :param cmp\_method: :param nfa\_method:

**compareMinimalDFA** (*r*, *nfa\_method*=*'nfaPosition'*)

Compare with another regular expression for equivalence through minimal DFAs. :param r: :param nfa\_method:

**derivative** (*sigma*)

Derivative of the regular expression in relation to the given symbol.

**Parameters** *sigma* – an arbitrary symbol.

**Return type** regular expression

---

**Note:** whether the symbols belong to the expression's alphabet goes unchecked. The given symbol will be matched against the string representation of the regular expression's symbol.

---

**See also:**

10. (a)Brzozowski, Derivatives of Regular Expressions. J. ACM 11(4): 481-494 (1964)

**dfaPosition** ()

Deterministic position automaton of a regular expression.

**Returns** position DFA

**Return type** DFA

**Raises** **common.DFAnotNFAFAdo** if not DFA

---

**Note:** If this expression is not linear (cf. `linearP()`), exception may be raised on non-deterministic transitions.

---

**emptyP** ()

Whether the regular expression is the empty set.

**Return type** Boolean

**epsilonLength** ()

Number of occurrences of the empty word in the regular expression.

**Return type** integer

**epsilonP** ()

Whether the regular expression is the empty word.

**Return type** Boolean

**equivalentP** (*other*)

Tests equivalence

**Parameters** *other* –

**Return type** bool

**evalWordP** (*word*)

Verifies if a word is a member of the language represented by the regular expression.

**Parameters** *word* (*str*) – the word

**Return type** bool

**ewp** ()

Whether the empty word property holds for this regular expression's language.

**Return type** Boolean

**first** (*parent\_first=None*)

List of possible symbols matching the first symbol of a string in the language of the regular expression.

**Parameters** *parent\_first* –

**Returns** list of symbols

**followLists** (*lists=None*)

Map of each symbol's follow list in the regular expression.

**Parameters** *lists* –

**Returns** map of symbols' follow lists

**Return type** {symbol: list of symbols}

**Attention:** For first() and last() return lists, the follow list for certain symbols might have repetitions in the case of follow maps calculated from star operators. The union of last(), first() and follow() sets are always disjoint when the regular expression is in star normal form ( Bruggemann-Klein, 92), therefore FAdo implements them as lists. You should order exclusively, or take a set from a list in order to resolve repetitions.

**followListsD** (*lists=None*)

Map of each symbol's follow list in the regular expression.

**Parameters** *lists* –

**Returns** map of symbols' follow lists

**Return type** {symbol: list of symbols}

**Attention:** For first() and last() return lists, the follow list for certain symbols might have repetitions in the case of follow maps calculated from star operators. The union of last(), first() and follow() sets are always disjoint

**See also:**

Sabine Broda, António Machiavelo, Nelma Moreira, and Rogério Reis. On the average size of glushkov and partial derivative automata. International Journal of Foundations of Computer Science, 23(5):969-984, 2012.

**followListsStar** (*lists=None*)

Map of each symbol's follow list in the regular expression under a star.

**Parameters** *lists* –

**Returns** map of symbols' follow lists

**Return type** {symbol: list of symbols}

**last** (*parent\_last=None*)

List of possible symbols matching the last symbol of a string in the language of the regular expression.

**Parameters** *parent\_last* –

**Returns** list of symbols

**Return type** list

**linearForm** ()

Linear form of the regular expression , as a mapping from heads to sets of tails, so that each pair (head, tail) is a monomial in the set of linear forms.

**Returns** dictionary mapping heads to sets of tails

**Return type** {symbol: set([regular expressions])}

**See also:**

Antimirov, 95

**linearP** ()

Whether the regular expression is linear; i.e., the occurrence of a symbol in the expression is unique.

**Return type** boolean

**marked** ()

Regular expression in which every alphabetic symbol is marked with its position.

The kind of regular expression returned is known, depending on the literary source, as marked, linear or restricted regular expression.

**Returns** linear regular expression

**Return type** regexp

**See also:**

R. McNaughton and H. Yamada, Regular Expressions and State Graphs for Automata, IEEE Transactions on Electronic Computers, V.9 pp:39-47, 1960

..attention: mark and unmark do not preserve the alphabet, neither set the new alphabet

**measure** (*from\_parent=None*)

A list with four measures for regular expressions.

**Parameters** *from\_parent* –

**Return type** [int,int,int,int]

[alphabeticLength, treeLength, epsilonLength, starHeight]

- 1.alphabeticLength: number of occurrences of symbols of the alphabet;
- 2.treeLength: number of functors in the regular expression, including constants.
- 3.epsilonLength: number of occurrences of the empty word.
- 4.starHeight: highest level of nested Kleene stars, starting at one for one star occurrence.

**Attention:** Methods for each of the measures are implemented independently. This is the most effective for obtaining more than one measure.

**nfaFollow** ()

NFA that accepts the regular expression's language, whose structure, and construction.

**Return type** NFA

**See also:**

Ilie & Yu (Follow Automata, 03)

**nfaFollowEpsilon** (*trim=True*)

Epsilon-NFA constructed with Ilie and Yu's method () that accepts the regular expression's language.

**Parameters** *trim* –

**Returns** NFA possibly with epsilon transitions

**Return type** NFae

**See also:**

Ilie & Yu, Follow automata, Inf. Comp. ,v. 186 (1),140-162,2003

**nfaGlushkov** ()

Position or Glushkov automaton of the regular expression. Recursive method.

**Returns** NFA

**nfaNaiveFollow()**

NFA that accepts the regular expression's language, and is equal in structure to the follow automaton.

**Return type** NFA

---

**Note:** Included for testing purposes.

---

**See also:**

Ilie & Yu (Follow Automata, 2003)

**nfaPD()**

**NFA that accepts the regular expression's language**, and which is constructed from the expression's partial derivatives.

**Returns** partial derivatives [or equation] automaton

**Return type** NFA

**See also:**

V. M. Antimirov, Partial Derivatives of Regular Expressions and Finite Automaton Constructions .Theor. Comput. Sci.155(2): 291-319 (1996)

**nfaPDO()**

**NFA that accepts the regular expression's language, and which is constructed from the expression's partial derivatives.**

---

**Note:** optimized version

---

**Returns** partial derivatives [or equation] automaton

**Return type** NFA

**nfaPSNF()**

Position or Glushkov automaton of the regular expression constructed from the expression's star normal form.

**Returns** position automaton

**Return type** NFA

**nfaPosition(lstar=True)**

Position automaton of the regular expression.

**Parameters** *lstar* (*boolean*) – if not None followlists are computed disjunct

**Returns** position NFA

**Return type** NFA

**nfaThompson()**

Epsilon-NFA constructed with Thompson's method that accepts the regular expression's language.

**Return type** NFA

**See also:**

11.Thompson. Regular Expression Search Algorithm. CACM 11(6), 419-422 (1968)

**partialDerivatives(sigma)**

Set of partial derivatives of the regular expression in relation to given symbol.

**Parameters** *sigma* – symbol in relation to which the derivative will be calculated.

**Returns** set of regular expressions

**See also:**

Antimirov, 95

**reduced** (*hasEpsilon=False*)

Equivalent regular expression with the following cases simplified:

1.  $\text{Epsilon}.\text{RE} = \text{RE}.\text{Epsilon} = \text{RE}$
2.  $\text{EmptySet}.\text{RE} = \text{RE}.\text{EmptySet} = \text{EmptySet}$
3.  $\text{EmptySet} + \text{RE} = \text{RE} + \text{EmptySet} = \text{RE}$
4.  $\text{Epsilon} + \text{RE} = \text{RE} + \text{Epsilon} = \text{RE}$ , where  $\text{Epsilon}$  is in  $L(\text{RE})$
5.  $\text{RE}^{**} = \text{RE}^*$
6.  $\text{EmptySet}^* = \text{Epsilon}^* = \text{Epsilon}$

**Parameters** **hasEpsilon** – used internally to indicate that the language of which this term is a subterm has the empty word.

**Returns** regular expression

**Attention:** Returned structure isn't strictly a duplicate. Use `__copy__()` for that purpose.

**reversal** ()

Reversal of regexp

**Return type** regexp

**rpn** ()

RPN representation :return: printable RPN representation

**setOfSymbols** ()

Set of symbols that occur in a regular expression..

**Returns** set of symbols

**Return type** set of symbols

**setSigma** (*symbolSet, strict=False*)

Set the alphabet for a regular expression and all its nodes

**Parameters**

- **symbolSet** (*list or set of str*) – accepted symbols. If None, alphabet is unset.
- **strict** (*bool*) – if True checks if setOfSymbols is included in symbolSet

..attention: Normally this attribute is not defined in a regexp()

**snf** (*hollowdot=False*)

Star Normal Form (SNF) of the regular expression.

**Parameters** **hollowdot** –

**Returns** regular expression in star normal form

**starHeight** ()

Maximum level of nested regular expressions with a star operation applied.

For instance, `starHeight(((a*b)*+b*)*)` is 3.

**Return type** integer

**stringLength** ()

Length of the string representation of the regular expression.

**Return type** integer

**support** ()

‘Support of a regular expression.

**Returns** set of regular expressions

**Return type** set

**See also:**

Champarnaud, J.M., Ziadi, D.: From Mirkin’s prebases to Antimirov’s word partial derivative. Fundam. Inform. 45(3), 195-205 (2001)

**toDFA** ()

DFA that accepts the regular expression’s language

**toNFA** (*nfa\_method*=‘nfaPD’)

NFA that accepts the regular expression’s language. :param nfa\_method:

**treeLength** ()

Number of nodes of the regular expression’s syntactical tree.

**Return type** integer

**unmarked** ()

The unmarked form of the regular expression. Each leaf in its syntactical tree becomes a `regexp()`, the `epsilon()` or the `emptyset()`.

**Return type** (general) regular expression

**wordDerivative** (*word*)

**Derivative of the regular expression in relation to the given word**, which is represented by a list of symbols.

**Parameters** **word** – list of arbitrary symbols.

**Return type** regular expression

**See also:**

10. (a)Brzozowski, Derivatives of Regular Expressions. J. ACM 11(4): 481-494 (1964)

## 5.2 Class specialConstant

**class** `reex.specialConstant` (*sigma*=None)

Bases: `reex.regexp`

Base class for Epsilon and EmptySet

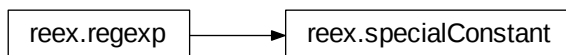

**Parameters** **sigma** –

**alphabeticLength** ()

**Returns**

**derivative** (*sigma*)

Parameters **sigma** –

Returns

**first** (*parent\_first=None*)

Parameters **parent\_first** –

Returns

**followLists** (*lists=None*)

Parameters **lists** –

Returns

**followListsD** (*lists=None*)

Parameters **lists** –

Returns

**followListsStar** (*lists=None*)

Parameters **lists** –

Returns

**last** (*parent\_last=None*)

Parameters **parent\_last** –

Returns

**linearForm** ()

Returns

**reversal** ()

Reversal of regexp

Return type regexp

**setOfSymbols** ()

Returns

**support** ()

Returns

**unmarked** ()

The unmarked form of the regular expression. Each leaf in its syntactical tree becomes a `regexp()`, the `epsilon()` or the `emptyset()`.

Return type (general) regular expression

**wordDerivative** (*word*)

Parameters **word** –

Returns

## 5.3 Class epsilon

**class** `reex.epsilon` (*sigma=None*)

Bases: `reex.specialConstant`

Class that represents the empty word.

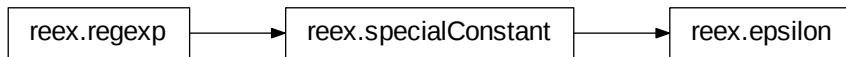

**Parameters** *sigma* –

**epsilonLength** ()

**Return type** int

**epsilonP** ()

**Return type** bool

**ewp** ()

**Return type** bool

**measure** (*from\_parent=None*)

**Parameters** *from\_parent* –

**Returns** measures

**nfaThompson** ()

**Return type** NFA

**partialDerivatives** (*sigma*)

**Parameters** *sigma* –

**Returns**

**rpn** ()

**Returns** str

**snf** (*\_hollowdot=False*)

**Parameters** *\_hollowdot* –

**Returns**

## 5.4 Class emptyset

**class** `reex.emptyset` (*sigma=None*)

Bases: `reex.specialConstant`

Class that represents the empty set.

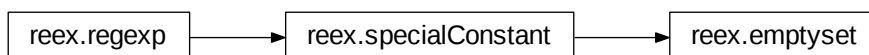

**Parameters** *sigma* –

**emptyP** ()

**Returns**

**epsilonLength** ()

**Returns**

**epsilonP** ()

**Returns**

**ewp** ()

**Returns**

**measure** (*from\_parent=None*)

**Parameters** *from\_parent* –

**Returns**

**rpn** ()

**Returns**

## 5.5 Class connective

**class** `reex.connective` (*arg1, arg2, sigma=None*)

Bases: `reex.regexp`

Base class for concatenation, and disjunction operations.

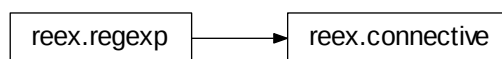

## 5.6 Class star

**class** `reex.star` (*arg, sigma=None*)

Bases: `reex.regexp`

Class for iteration operation (aka Kleene star, or Kleene closure) on regular expressions.

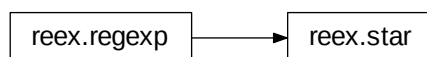

**nfaThompson** ()

Returns a NFA that accepts the RE.

**Return type** NFA

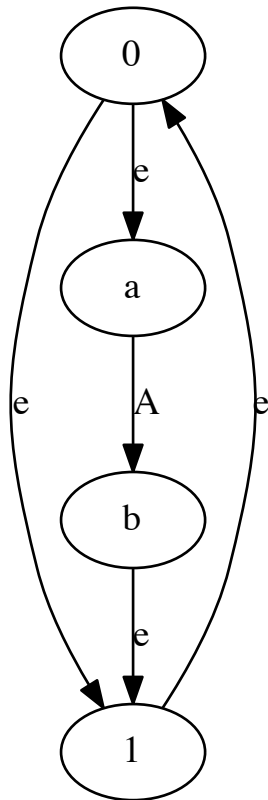

**reversal()**  
 Reversal of regexp  
**Return type** regexp

## 5.7 Class concat

**class** reex.concat (*arg1, arg2, sigma=None*)  
 Bases: reex.connective  
 Class for catenation operation on regular expressions.

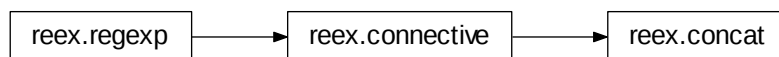

**reversal()**  
 Reversal of regexp :rtype: regexp

## 5.8 Class `disj`

**class** `reex.disj` (*arg1*, *arg2*, *sigma=None*)

Bases: `reex.connective`

Class for disjunction operation on regular expressions.

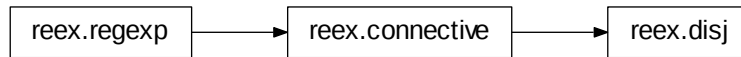

**nfaThompson** ()

Returns an NFA (Thompson) that accepts the RE.

**Return type** NFA

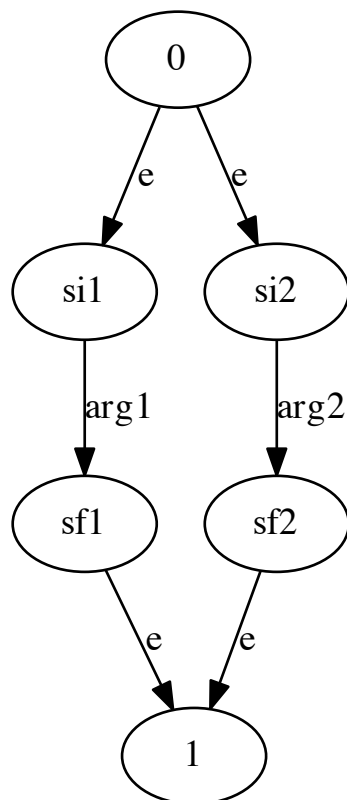

**reversal** ()

Reversal of `regexp` :rtype: `regexp`

## 5.9 Class position

**class** `reex.position` *((sym, pos), sigma=None)*

Bases: `reex.regexp`

Class for marked regular expression symbols.

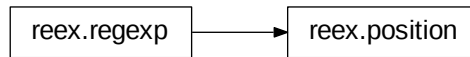

## 5.10 Class ParseReg

**class** `reex.ParseReg` *(no\_table=0, table='tableambreg')*

Bases: `reex.ParseReg1`

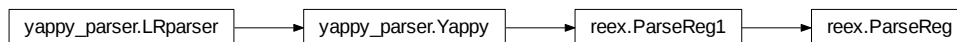

A parser for regular expressions with ambiguous rules: not working

## 5.11 Functions

`reex.str2regexp` *(s, parser=<class 'reex.ParseReg1'>, no\_table=1, sigma=None, strict=False)*

Reads a regexp from string.

### Parameters

- **s** (*string*) – the string representation of the regular expression
- **parser** (*Yappy*) – a parser generator for regexps
- **no\_table** (*integer*) –
- **sigma** (*list or set of symbols*) – alphabet of the regular expression
- **strict** (*boolean*) – if True tests if the symbols of the regular expression are included in the sigma

**Return type** `regexp`

`reex.rpn2regexp` *(s, sigma=None, strict=False)*

Reads a regexp from a RPN representation

```

R ::= .RR | +RR | \*R | L | @
L ::= [a-z] | [A-Z]
  
```

**Parameters** **s** (*string*) – RPN representation

**Return type** `regex`

---

**Note:** This method uses python stack... thus depdth limitations apply

---

## MODULE: EXTENDED REGULAR EXPRESSIONS (XRE)

### Extended regular expressions manipulation

Extended regular expression classes and its manipulation

New in version 0.9.8.

### 6.1 Class xre (extended regular expression)

**class** `xre.xre` (*val*, *sigma=None*)

Bases: `reex.regexp`

Base class for extended regular expressions, used directly to represent a symbol.

**Variables** `val` – the actual symbol

Constructor of a regular expression symbol.

**Parameters** `val` – the actual symbol

**PD** ()

Closure of partial derivatives of the regular expression in relation to all words.

**Returns** set of regular expressions

**Return type** set

**compare** (*r*, *cmp\_method='equivP'*, *nfa\_method=None*)

Compare with another regular expression for equivalence. :param *r*: :param *cmp\_method*: :param *nfa\_method*:

**concatenation** (*r*)

Computes the concatenation of two regular expressions.

**Parameters** *r* (*xre*) – a regular expression

**Return type** *xre*

**derivative** (*sigma*)

Derivative of the regular expression in relation to the given symbol.

**Parameters** *sigma* – an arbitrary symbol.

**Return type** regular expression

---

**Note:** whether the symbols belong to the expression's alphabet goes unchecked. The given symbol will be matched against the string representation of the regular expression's symbol.

---

**See also:**

10. (a)Brzozowski, Derivatives of Regular Expressions. J. ACM 11(4): 481-494 (1964)

**dfaDerivatives** ()

Word derivatives automaton of the regular expression

**Returns** word derivatives automaton

**Return type** DFA

**See also:**

10. (a)Brzozowski, Derivatives of Regular Expressions. J. ACM 11(4): 481-494 (1964)

**dfs** ()

Minimal DFA of an extended regular expression :return: minimal DFA :rtype: DFA

**equivP** (*reg*)

Verifies if two regular expressions are equivalent.

**Parameters** *reg* – regular expression

**Return type** bool

**intersection** (*sx*)

Computes the intersection of two regular expressions.

**Parameters** *sx* (*xre*) – a regular expression

**Return type** xre

**linearForm** ()

**Linear form of the extended regular expression , as a mapping from heads to sets of tails, so that each pair (head,tail) is a monomial in the set of linear forms.**

**Returns** dictionary mapping heads to sets of tails

**Return type** {symbol: set([regular expressions])}

**See also:**

Antimirov, 95

**nfaPD** ()

**NFA that accepts the regular expression's language, and which is constructed from the expression's partial derivatives.**

**Returns** partial derivatives [or equation] automaton

**Return type** NFA

**See also:**

V. M. Antimirov, Partial Derivatives of Regular Expressions and Finite Automaton Constructions. Theor. Comput. Sci.155(2): 291-319 (1996)

..attention why different from reex.nfaPD

**partialDerivativeC** (*sigma*)

**Parameters** *sigma* –

**Return type** xre

**support** ()

'Support of a regular expression.

**Returns** set of regular expressions

**Return type** set

**See also:**

Champarnaud, J.M., Ziadi, D.: From Mirkin's prebases to Antimirov's word partial derivative. *Fundam. Inform.* 45(3), 195-205 (2001)

**toDFA** (*dfa\_method*='dfaDerivatives')

DFA that accepts the regular expression's language. :param dfa\_method:

**toNFA** (*nfa\_method*='nfaPD')

NFA that accepts the regular expression's language. :param nfa\_method:

**unionSigma** (*reg*)

Returns the union of two alphabets

**Parameters** *reg* – xre

**Return type** set

## 6.2 Functions

*xre.to\_x* (*reg*)

Reads xre from FAdo regexp.

**Parameters**

- **reg** (*regexp*) –
- **re** – the FAdo representation regexp for a regular expression.

**Return type** xre



## MODULE: TRANSDUCERS (TRANSDUCERS)

### Finite Tranducer Support

Transducer manipulation.

New in version 1.0.

## 7.1 Class Transducer

**class** `transducers.Transducer`

Bases: `fa.NFA`

Base class for Transducers

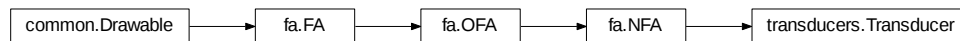

**setOutput** (*listOfSymbols*)

Set Output

**Parameters** *listOfSymbols* (*set/list*) – output symbols

**succinctTransitions** ()

Collects the transition information in a concat way suitable for graphical representation. :rtype: list of tuples

## 7.2 Class SFT (Standard Form Transducers)

**class** `transducers.SFT`

Bases: `transducers.GFT`

Standard Form Tranducer

**Variables** *Output* (*set*) – output alphabet

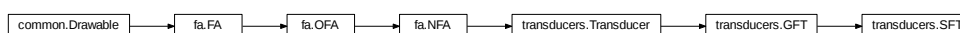

**addEpsilonLoops** ()

Add a loop transition with epsilon input and output to every state in the transducer.

**addOutput** (*sym*)

Add a new symbol to the output alphabet

There is no problem with duplicate symbols because Output is a Set. No symbol Epsilon can be added

**Parameters** **sym** (*str*) – symbol or regular expression to be added

**addTransition** (*stsrc, symi, symo, sti2*)

Adds a new transition

**Parameters**

- **stsrc** (*int*) – state index of departure
- **sti2** (*int*) – state index of arrival
- **symi** (*str*) – symbol consumed
- **symo** (*str*) – symbol output

**addTransitionQ** (*src, dest, sym, out, futQ, pastQ*)

Add transition to the new transducer instance.

**Parameters**

- **src** – source state
- **dest** – destination state
- **sym** – symbol
- **out** – output
- **futQ** (*set*) – queue for later
- **pastQ** (*set*) – past queue

**composition** (*other*)

Composition operation of a transducer with a transducer.

**Parameters** **other** (*SFT*) – the second transducer

**Return type** SFT

**concat** (*other*)

Concatenation of transducers

**Parameters** **other** (*SFT*) – the other operand

**Return type** SFT

**delTransition** (*sti1, sym, symo, sti2, \_no\_check=False*)

Remove a transition if existing and perform cleanup on the transition function's internal data structure.

**Parameters**

- **symo** – symbol output
- **sti1** (*int*) – state index of departure
- **sti2** (*int*) – state index of arrival
- **sym** – symbol consumed
- **\_no\_check** (*bool*) – dismiss secure code

**deleteState** (*sti*)

Remove given state and transitions related with that state.

**Parameters** **sti** (*int*) – index of the state to be removed

**Raises** **DFastateUnknown** if state index does not exist

**deleteStates** (*lstates*)

Delete given iterable collection of states from the automaton.

**Parameters** `lstates` (*setlist*) – collection of int representing states

**dup** ()

Duplicate of itself :rtype: SFT

**Attention:** only duplicates the initially connected component

**emptyP** ()

Tests if the relation realized the empty transducer

**Return type** bool

**epsilonOutP** ()

Tests if epsilon occurs in transition outputs

**Return type** bool

**epsilonP** ()

Test whether this transducer has input epsilon-transitions

**Return type** bool

**evalWordP** (*wp*)

Tests whether the transducer returns the second word using the first one as input

**Parameters** `wp` (*tuple*) – pair of words

**Return type** bool

**functionalP** ()

Tests if a transducer is functional using Allauzer & Mohri and Béal&Carton&Prieur&Sakarovitch algorithms.

**Return type** bool

**See also:**

Cyril Allauzer and Mehryar Mohri, Journal of Automata Languages and Combinatorics, Efficient Algorithms for Testing the Twins Property, 8(2): 117-144, 2003.

**See also:**

M.P. Béal, O. Carton, C. Prieur and J. Sakarovitch. Squaring transducers: An efficient procedure for deciding functionality and sequentiality. Theoret. Computer Science 292:1 (2003), 45-63.

---

**Note:** This is implemented using `nonFunctionalW()`

---

**inIntersection** (*other*)

Conjunction of transducer and automata:  $X \& Y$ .

**Parameters** `other` (*DFA|NFA*) – the automata needs to be operated.

**Return type** SFT

**inverse** ()

Switch the input label with the output label.

No initial or final state changed.

**Returns** Transducer with transitions switched.

**Return type** SFT

**nonEmptyW** ()

Witness of non emptiness

**Returns** pair (in-word, out-word)

**Return type** tuple

**nonFunctionalW()**

Returns a witness of non functionality (if is that the case) or a None filled triple

**Returns** witness

**Return type** tuple

**outIntersection(*other*)**

Conjunction of transducer and automaton: X & Y using output intersect operation.

**Parameters** *other* (*DFA|NFA*) – the automaton used as a filter of the output

**Return type** SFT

**outIntersectionDerived(*other*)**

Naive version of outIntersection

**Parameters** *other* (*DFA|NFA*) – the automaton used as a filter of the output

**Return type** SFT

**outputS(*s*)**

Output label coming out of the state *i*

**Parameters** *s* (*int*) – index state

**Return type** set

**productInput(*other*)**

Returns a transducer (skeleton) resulting from the execution of the transducer with the automaton as filter on the input.

**Parameters** *other* (*NFA*) – the automaton used as filter

**Return type** SFT

**reversal()**

Returns a transducer that recognizes the reversal of the relation.

**Returns** Transducer recognizing reversal language

**Return type** SFT

**runOnNFA(*nfa*)**

Result of applying a transducer to an automaton

**Parameters** *nfa* (*DFA|NFA*) – input language to transducer

**Returns** resulting language

**Return type** NFA

**runOnWord(*word*)**

Returns the automaton accepting the outup of the transducer on the input word

**Parameters** *word* – the word

**Return type** NFA

**setInitial(*sts*)**

Sets the initial state of a Transducer

**Parameters** *sts* (*list*) – list of states

**square()**

Conjunction of transducer with itself

**Return type** NFA

**square\_fv()**

Conjunction of transducer with itself (Fast Version)

**Return type** NFA

**star** (*flag=False*)

Kleene star

**Parameters** **flag** (*bool*) – plus instead of star

**Returns** the resulting Transducer

**Return type** SFT

**toInNFA** ()

Delete the output labels in the transducer. Translate it into an NFA

**Return type** NFA

**toNFT** ()

Transformation into Nomal Form Transducer

**Return type** NFT

**toOutNFA** ()

Returns the result of considering the output symbols of the transducer as input symbols of a NFA (ignoring the input symbol, thus)

**Returns** the NFA

**Return type** NFA

**toSFT** ()

Pacifying rule

**Return type** SFT

**trim** ()

Remove states that do not lead to a final state, or, inclusively, that can't be reached from the initial state. Only useful states remain.

|                                           |
|-------------------------------------------|
| <b>Attention:</b> in place transformation |
|-------------------------------------------|

**union** (*other*)

Union of the two transducers

**Parameters** **other** (*SFT*) – the other operand

**Return type** SFT

## 7.3 Functions



## MODULE: FINITE LANGUAGES (FL)

Finite languages and related automata manipulation

Finite languages manipulation

### 8.1 Class FL (Finite Language)

**class** `fl.FL` (*wordsList=None, Sigma=set([])*)

Bases: `object`

Finite Language Class

#### Variables

- **Words** – the elements of the language
- **Sigma** – the alphabet

**addWords** (*wList*)

Adds a list of words to a FL

**Parameters** **wList** (*list*) – words to add

**diff** (*other*)

Difference of FL:  $a - b$

**Parameters** **other** (*FL*) – right hand operand

**Return type** FL

**Raises** **FAdoGeneralError** if both arguments are not FL

**filter** (*automata*)

Separates a language in two other using a DFA or NFA as a filter

**Parameters** **automata** (*DFA|NFA*) – the automata to be used as a filter

**Returns** the accepted/unaccepted pair of languages

**Return type** tuple of FL

**intersection** (*other*)

Intersection of FL:  $a \& b$

**Parameters** **other** (*FL*) – right hand operand

**Raises** **FAdoGeneralError** if both arguments are not FL

**multiLineAutomaton** ()

Generates the trivial linear ANFA equivalent to this language

**Return type** ANFA

**reunion** (*other*)

Reunion of FL:  $a | b$

**Parameters** **other** (*FL*) – right hand operand

**Return type** FL

**Raises** **FAdoGeneralError** if both arguments are not FL

**setSigma** (*Sigma*, *Strict=False*)

Sets the alphabet of a FL

**Parameters**

- **Sigma** (*set*) – alphabet
- **Strict** (*bool*) – behaviour

**Attention:** Unless Strict flag is set to True, alphabet can only be enlarged. The resulting alphabet is in fact the union of the former alphabet with the new one. If flag is set to True, the alphabet is simply replaced.

**suffixClosedP** ()

Tests if a language is suffix closed

**Return type** bool

**toDFA** ()

Generates a DFA recognizing the language

**Return type** ADFA

New in version 1.2.

**toNFA** ()

Generates a NFA recognizing the language

**Return type** ANFA

New in version 1.2.

**trieFA** ()

Generates the trie automaton that recognises this language

**Returns** the trie automaton

**Return type** ADFA

## 8.2 Class DCFA (Deterministic Cover Finite Automata)

**class** fl.DCFA

Bases: fa.DFA

Deterministic Cover Automata class

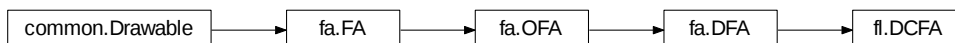

**length**

**Returns** size of the longest word

**Return type** int

## 8.3 Class AFA (Acyclic Finite Automata)

class `fl.AFA`

Bases: `object`

Base class for Acyclic Finite Automata

fl.AFA

---

**Note:** This is just a container for some common methods. **Not to be used directly!!**

---

**addState** ()

**Return type** `int`

**directRank** ()

Compute rank function

**Returns** `ranf map`

**Return type** `dict`

**ensureDead** ()

Ensures that a state is defined as dead

**evalRank** ()

Evaluates the rank map of a automaton

**Returns** pair of sets of states by rank map, reverse delta accessibility map

**Return type** `tuple`

**getLeaves** ()

The set of leaves, i.e. final states for last symbols of language words

**Returns** `set of leaves`

**Return type** `set`

**ordered** ()

Orders states names in its topological order

**Returns** `ordered list of state indexes`

**Return type** `list of int`

---

**Note:** one could use the `FA.toposort()` method, but special care must be taken with the dead state for the algorithms related with cover automata.

---

**setDeadState** (*sti*)

Identifies the dead state

**Parameters** *sti* (*int*) – index of the dead state

**Attention:** nothing is done to ensure that the state given is legitimate

---

**Note:** without dead state identified, most of the methods for acyclic automata can not be applied

---

## 8.4 Class ADFA (Acyclic Deterministic Finite Automata)

**class** `fl.ADFA`

Bases: `fa.DFA`, `fl.AFA`

Acyclic Deterministic Finite Automata class

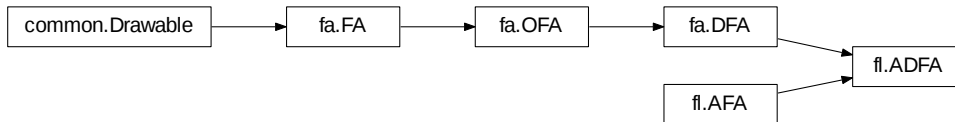

**complete** (*dead=None*)

Make the ADFA complete

**Parameters** *dead* (*int*) – a state to be identified as dead state if one was not identified yet

**Return type** ADFA

**Attention:** The object is modified in place

**dup** ()

Duplicate the basic structure into a new ADFA. Basically a copy.deep.

**Return type** ADFA

**forceToDCFA** ()

Conversion to DCFA

**Return type** DFA

**level** ()

Computes the level for each state

**Returns** levels of states

**Return type** dict

New in version 0.9.8.

**minDFCA** ()

Generates a minimal deterministic cover automata from a DFA

**Return type** DCFA

New in version 0.9.8.

**See also:**

Cezar Campeanu, Andrei Păun, and Sheng Yu, An efficient algorithm for constructing minimal cover automata for finite languages, IJFCS

**minimal** ()

Finds the minimal equivalent ADFA

**See also:**

[TCS 92 pp 181-189] Minimisation of acyclic deterministic automata in linear time, Dominique Revuz

**Returns** the minimal equivalent ADFA

**Return type** ADFA

**minimalP** (*method=None*)

Tests if the DFA is minimal

**Parameters** **method** – minimization algorithm (here void)

**Return type** bool

**toANFA** ()

Converts the ADFA in a equivalent ANFA

**Return type** ANFA

**toNFA** ()

Converts the ADFA in a equivalent NFA

**Return type** ANFA

New in version 1.2.

**trim** ()

Remove states that do not lead to a final state, or, inclusively, that can't be reached from the initial state. Only useful states remain.

**Attention:** in place transformation

**wordGenerator** ()

Creates a random word generator

**Returns** the random word generator

**Return type** RndWGen

New in version 1.2.

## 8.5 Class ANFA (Acyclic Non-deterministic Finite Automata)

**class** `fl.ANFA`

Bases: `fa.NFA`, `fl.AFA`

Acyclic Nondeterministic Finite Automata class

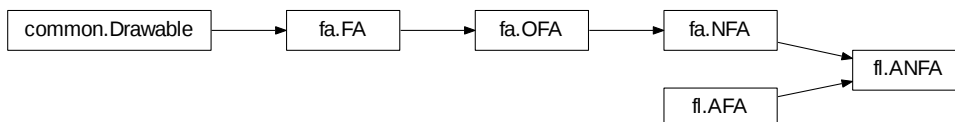

**mergeInitial** ()

Merge initial states

**Attention:** object is modified in place

**mergeLeaves** ()

Merge leaves

**Attention:** object is modified in place

**mergeStates** (*s1*, *s2*)  
Merge state *s2* into state *s1*

**Parameters**

- **s1** (*int*) – state
- **s2** (*int*) – state

---

**Note:** no attempt is made to check if the merging preserves the language of the automaton

---

**Attention:** the object is modified in place

**moveFinal** (*st*, *stf*)  
Unsets a set as final transferring transition to another final :param int *st*: the state to be ‘moved’ :param int *stf*: the destination final state

---

**Note:** *stf* must be a ‘last’ final state, i.e., must have no out transitions to anywhere but to a possible dead state

---

**Attention:** the object is modified in place

## 8.6 Class RndWGen (Random Word Generator)

**class** `f1.RndWGen` (*aut*)

Bases: `object`

Word random generator class

New in version 1.2.

**Parameters** *aut* (ADFA) – automata recognizing the language

**next** ()

Next word

**Returns** a new random word

## 8.7 Functions

`f1.sigmaInitialSegment` (*Sigma*, *l*, *exact=False*)

Generates the ADFA recognizing  $\Sigma^i$  for  $i \leq l$  :param set *Sigma*: the alphabet :param int *l*: length :param bool *exact*: only the words with exactly that length? :returns: the automaton :rtype: ADFA

`f1.genRndTrieBalanced` (*maxL*, *Sigma*, *safe=True*)

Generates a random trie automaton for a binary language of balanced words of a given length for max word :param int *maxL*: length of the max word :param set *Sigma*: alphabet to be used :param bool *safe*: should a word of size *maxL* be present in every language? :return: the generated trie automaton :rtype: ADFA

`f1.genRndTrieUnbalanced` (*maxL*, *Sigma*, *ratio*, *safe=True*)

Generates a random trie automaton for a binary language of balanced words of a given length for max word

**Parameters**

- **maxL** (*int*) – length of the max word

- **Sigma** (*set*) – alphabet to be used
- **ratio** (*int*) – the ratio of the unbalance
- **safe** (*bool*) – should a word of size `maxl` be present in every language?

**Returns** the generated trie automaton

**Return type** ADFA

f1.**genRandomTrie** (*maxL, Sigma, safe=True*)

Generates a random trie automaton for a finite language with a given length for max word :param int maxL: length of the max word :param set Sigma: alphabet to be used :param bool safe: should a word of size `maxl` be present in every language? :return: the generated trie automaton :rtype: ADFA

f1.**genRndTriePrefix** (*maxL, Sigma, ClosedP=False, safe=True*)

Generates a random trie automaton for a finite (either prefix free or prefix closed) language with a given length for max word :param int maxL: length of the max word :param set Sigma: alphabet to be used :param bool ClosedP: should it be a prefix closed language? :param bool safe: should a word of size `maxl` be present in every language? :return: the generated trie automaton :rtype: ADFA

f1.**DFAtoADFA** (*aut*)

Transforms an acyclic DFA into a ADFA

**Parameters** *aut* (DFA) – the automaton to be transformed

**Raises** **notAcyclic** if the DFA is not acyclic

**Returns** the converted automaton

**Return type** ADFA

f1.**stringToADFA** (*s*)

Convert a canonical string representation of a ADFA to a ADFA :param list s: the string in its canonical order :returns: the ADFA :rtype: ADFA

**See also:**

Marco Almeida, Nelma Moreira, and Rogério Reis. Exact generation of minimal acyclic deterministic finite automata. International Journal of Foundations of Computer Science, 19(4):751-765, August 2008.



## MODULE: GRAPHS (GRAPH CREATION AND MANIPULATION)

### Graph support

Basic Graph object support and manipulation

**class** `graphs.Graph`

Bases: `common.Drawable`

Graph base class

#### Variables

- **Vertices** (*list*) – Vertices' names
- **Edges** (*set*) – set of pairs (always sorted)

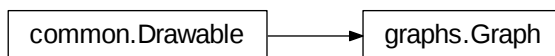

**addEdge** (*v1*, *v2*)

Adds an edge :param int *v1*: vertex 1 index :param int *v2*: vertex 2 index :raises `GraphError`: if edge is loop

**addVertex** (*vname*)

Adds a vertex (by name)

**Parameters** *vname* – vertex name

**Returns** vertex index

**Return type** int

**Raises** `DuplicateName` if *vname* already exists

**vertexIndex** (*vname*, *autoCreate=False*)

Return vertex index

#### Parameters

- **autoCreate** (*bool*) – auto creation of non existing states
- **vname** – vertex name

**Return type** int

**Raises** `GraphError` if *vname* not found

**class** `graphs.DiGraph`

Bases: `graphs.Graph`

Directed graph base class

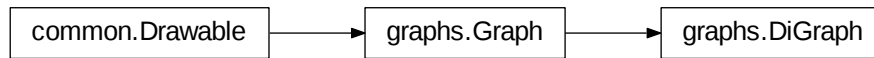

**addEdge** (*v1*, *v2*)

Adds an edge

**Parameters**

- **v1** (*int*) – vertex 1 index
- **v2** (*int*) – vertex 2 index

**static dotDrawEdge** (*st1*, *st2*, *sep*='n')

Draw a transition in Dot Format

**Parameters**

- **st1** (*str*) – starting state
- **st2** (*str*) – ending state
- **sep** (*str*) – separator

**Return type** str

**dotDrawVertex** (*sti*, *sep*='n')

Draw a Vertex in Dot Format

**Parameters**

- **sti** (*int*) – index of the state
- **sep** (*str*) – separator

**Return type** str

**dotFormat** (*size*='20, 20', *direction*='LR', *sep*='n')

A dot representation

**Parameters**

- **direction** (*str*) – direction of drawing
- **size** (*str*) – size of image
- **sep** (*str*) – line separator

**Returns** the dot representation

**Return type** str

New in version 0.9.6.

Changed in version 0.9.8.

**inverse** ()

Inverse of a digraph

**class** `graphs.DiGraphVm`

Bases: `graphs.DiGraph`

Directed graph with marked vertices

**Variables** **MarkedV** (*set*) – set of marked vertices

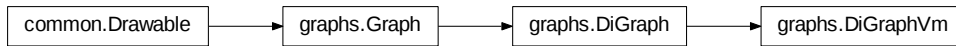

**markVertex** (*v*)

Mark vertex *v*

**Parameters** *v* (*int*) – vertex



## MODULE: CONTEXT FREE GRAMMARS MANIPULATION (CFG)

### Context Free Grammars Manipulation.

Basic context-free grammars manipulation for building uniform random generators

## 10.1 Class CFGrammar (Context Free Grammar)

```
class cfg.CFGrammar(gram)
```

Bases: `object`

Class for context-free grammars

#### Variables

- **Rules** – grammar rules
- **Terminals** – terminals symbols
- **Nonterminals** – nonterminals symbols
- **Start** – start symbol
- **ntr** – dictionary of rules for each nonterminal

Initialization

**Parameters gram** – is a list for productions; each production is a tuple (LeftHandside, RightHandside) with LeftHandside nonterminal, RightHandside list of symbols, First production is for start symbol

**NULLABLE()**

Determines which nonterminals  $X \rightarrow^* []$

**makenonterminals()**

Extracts  $C\{\text{nonterminals}\}$  from grammar rules.

**maketerminals()**

Extracts  $C\{\text{terminals}\}$  from the rules. Nonterminals must already exist

## 10.2 Class CNF

```
class cfg.CNF(gram, mark='A@')
```

Bases: `cfg.CFGrammar`

No useless nonterminals or epsilon rules are ALLOWED... Given a CFG grammar description generates one in CNF Then its possible to random generate words of a given size. Before some pre-calculations are needed.

**Chomsky()**

Transform to CNF

**elim\_unitary()**  
Elimination of unitary rules

## 10.3 Class cfgGenerator

**class** `cfg.cfgGenerator` (*cfgr, size*)  
Bases: `object`  
CFG uniform genetaror  
Object initialization :param cfgr: grammar for the random objects :type cfgr: CNF :param size: size of objects :type size: integer  
**generate()**  
Generates a new random object generated from the start symbol  
**Returns** object  
**Return type** string

## 10.4 Class reStringRGenerator (Reg Exp Generator)

**class** `cfg.reStringRGenerator` (*Sigma=['a', 'b'], size=10, cfgr=None, eps=None, empty=None, ident='Ti'*)  
Bases: `cfg.cfgGenerator`  
Uniform random Generator for reStrings  
Uniform random generator for regular expressions. Used without arguments generates an uncollapsible re over {a,b} with size 10. For generate an arbitrary re over an alphabet of 10 symbols of size 100: `reStringRGenerator(small_alphabet(10),100,reStringRGenerator.g_regular_base)`  
**Parameters**

- **Sigma** (*list or set*) – re alphabet (that will be the set of grammar terminals)
- **size** (*integer*) – word size
- **cfgr** – base grammar
- **epsilon** – if not None is added to a grammar terminals
- **empty** – if not None is added to a grammar terminals

---

**Note:** the grammar can have already this symbols

---

**generate()**  
Generates a new random RE string

## 10.5 Functions

`cfg.gRules` (*rules\_list, rulesym='->', rhssep=None, rulesep='|'*)  
Transforms a list of rules into a grammar description.

**Parameters**

- **rules\_list** – is a list of rule where rule is a string of the form: Word rulesym Word1 ... Word2 or Word rulesym []
- **rulesym** – LHS and RHS rule separator
- **rhssep** – RHS values separator (None for white chars)

**Returns** a grammar description

`cfg.smallAlphabet(k, sigma_base='a')`

Easy way to have small alphabets

**Parameters**

- **k** – alphabet size (must be less than 52)
- **sigma\_base** – initial symbol

**Returns** alphabet

**Return type** list



## MODULE: RANDOM DFA GENERATOR (`RNDFA`)

### Random DFA generation

ICDFA Random generation binding

Changed in version 0.9.4: Interface python to the C code

Changed in version 0.9.6: Working with incomplete automata

Changed in version 0.9.8: distinct classes for complete and incomplete ICDFA

## 11.1 Class `ICDFArgen` (Generator container)

**class** `rndfa.ICDFArgen`

Bases: `object`

Generic ICDFA random generator class

### See also:

Marco Almeida, Nelma Moreira, and Rogério Reis. Enumeration and generation with a string automata representation. *Theoretical Computer Science*, 387(2):93-102, 2007

**next** ()

Get the next generated DFA

**Returns** a random generated ICDFA

**Return type** DFA

## 11.2 Class `ICDFArnd` (Complete ICDFA random generator)

**class** `rndfa.ICDFArnd` (*n*, *k*)

Bases: `rndfa.ICDFArgen`

Complete ICDFA random generator class

This is the class for the uniform random generator for Initially Connected DFAs

### Variables

- **n** – number of states
- **k** – size of the alphabet

---

**Note:** This is an abstract class, not to be used directly

---

## 11.3 Class `ICDFArndIncomple` (Incomplete IC DFA generator)

**class** `rndfa.ICDFArndIncomplete` (*n*, *k*, *bias*=None)

Bases: `rndfa.ICDFArgen`

Incomplete IC DFA random generator class

### Variables

- **n** – number of states
- **k** – size of alphabet
- **bias** – how often must the gost sink state appear (default None)

**Raises** `IllegalBias` if a `bias >=1` or `<=0` is provided

## MODULE: COMBO OPERATIONS (COMBOOPERATIONS)

### Several combined operations for DFAs

Deterministic and non-deterministic automata manipulation, conversion and evaluation.

*Authors:* Rogério Reis & Nelma Moreira

*This is part of FAdo project* <http://fado.dcc.fc.up.pt>

*Version:* 0.9.5

*Copyright:* 1999-2012 Rogério Reis & Nelma Moreira {rvr,nam}@dcc.fc.up.pt

`comboperations.starConcat (fa1, fa2, strict=False)`

Star of concatenation of two languages:  $(L1.L2)^*$

#### Parameters

- **fa1** (*DFA*) – first automaton
- **fa2** (*DFA*) – second automaton
- **strict** (*Boolean*) – should the alphabets be necessary equal?

**Return type** DFA

#### See also:

Yuan Gao, Kai Salomaa, and Sheng Yu. ‘The state complexity of two combined operations: Star of catenation and star of reversal’. *Fundamenta Informaticae*, 83:75–89, Jan 2008.

`comboperations.concatWStar (fa1, fa2, strict=False)`

Concatenation combined with star:  $(L1.L2^*)$

#### Parameters

- **fa1** (*DFA*) – first automaton
- **fa2** (*DFA*) – second automaton
- **strict** (*bool*) – should the alphabets be necessary equal?

**Return type** DFA

#### See also:

Bo Cui, Yuan Gao, Lila Kari, and Sheng Yu. ‘State complexity of two combined operations: Reversal-catenation and star-catenation’. *CoRR*, abs/1006.4646, 2010.

`comboperations.starWConcat (fa1, fa2, strict=False)`

Star combined with concatenation:  $(L1^*.L2)$

#### Parameters

- **fa1** (*DFA*) – first automaton
- **fa2** (*DFA*) – second automaton
- **strict** (*Boolean*) – should the alphabets be necessary equal?

**Return type** DFA

**See also:**

Bo Cui, Yuan Gao, Lila Kari, and Sheng Yu. ‘State complexity of catenation combined with star and reversal’. CoRR, abs/1008.1648, 2010

`comboperations.starDisj` (*fa1*, *fa2*, *strict=False*)  
Star of Union of two DFAs:  $(L1 + L2)^*$

**Parameters**

- **fa1** (*DFA*) – first automaton
- **fa2** (*DFA*) – second automaton
- **strict** (*Boolean*) – should the alphabets be necessary equal?

**Return type** DFA

**See also:**

Arto Salomaa, Kai Salomaa, and Sheng Yu. ‘State complexity of combined operations’. Theor. Comput. Sci., 383(2-3):140–152, 2007.

`comboperations.starInter0` (*fa1*, *fa2*, *strict=False*)  
Star of Intersection of two DFAs:  $(L1 \& L2)^*$

**Parameters**

- **fa1** (*DFA*) – first automaton
- **fa2** (*DFA*) – second automaton
- **strict** (*Boolean*) – should the alphabets be necessary equal?

**Return type** DFA

**See also:**

Arto Salomaa, Kai Salomaa, and Sheng Yu. ‘State complexity of combined operations’. Theor. Comput. Sci., 383(2-3):140–152, 2007.

`comboperations.starInter` (*fa1*, *fa2*, *strict=False*)  
Star of Intersection of two DFAs:  $(L1 \& L2)^*$

**Parameters**

- **fa1** (*DFA*) – first automaton
- **fa2** (*DFA*) – second automaton
- **strict** (*Boolean*) – should the alphabets be necessary equal?

**Return type** DFA

`comboperations.disjWStar` (*f1*, *f2*, *strict=True*)  
Union with star:  $(L1 + L2^*)$

**Parameters**

- **f1** (*DFA*) – first automaton
- **f2** (*DFA*) – second automaton
- **strict** (*Boolean*) – should the alphabets be necessary equal?

**Return type** DFA

**See also:**

Yuan Gao and Sheng Yu. ‘State complexity of union and intersection combined with star and reversal’. CoRR, abs/1006.3755, 2010.

`comboperations.interWStar(f1, f2, strict=True)`

Intersection with star:  $(L1 \ \& \ L2^*)$

**Parameters**

- **f1** (*DFA*) – first automaton
- **f2** (*DFA*) – second automaton
- **strict** (*Boolean*) – should the alphabets be necessary equal?

**Return type** DFA

**See also:**

Yuan Gao and Sheng Yu. ‘State complexity of union and intersection combined with star and reversal’. CoRR, abs/1006.3755, 2010.



## MODULE: CODES (CODES)

Code theory module

New in version 1.0.

### 13.1 Class CodeProperty

**class** `codes.CodeProperty` (*name*, *alph*)

Bases: `object`

**See also:**

K. Dudzinski and S. Konstantinidis: Formal descriptions of code properties: decidability, complexity, implementation. International Journal of Foundations of Computer Science 23:1 (2012), 67–85.

**Variables** `Sigma` – the alphabet

### 13.2 Class TrajProp

**class** `codes.TrajProp` (*aut*, *Sigma*)

Bases: `codes.IATProp`

Class of trajectory properties

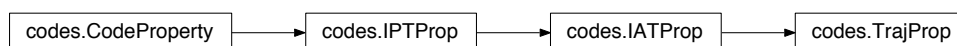

Constructor

**Parameters**

- **aut** (*DFA|NFA*) – regular expression over {0,1}
- **Sigma** (*set*) – the alphabet

**static** `trajToTransducer` (*traj*, *Sigma*)

Input Altering Transducer corresponding to a Trajectory

**Parameters**

- **traj** (*NFA*) – trajectory language
- **Sigma** (*set*) – alphabet

**Return type** SFT

## 13.3 Class IPTProp

**class** `codes.IPTProp` (*aut*, *name=None*)  
Bases: `codes.CodeProperty`  
Input Preserving Transducer Property

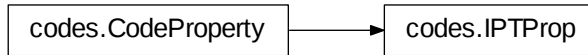

### Variables

- **Aut** (*SFT*) – the transducer defining the property
- **Sigma** (*set*) – alphabet

Constructor :param *SFT aut*: Input preserving transducer

**maximalP** (*aut*, *U=None*)  
Tests if the language is maximal w.r.t. the property

### Parameters

- **aut** (*NFA*) – the automaton
- **U** (*NFA*) – Universe of permitted words ( $\Sigma^*$  as default)

**Return type** `bool`

**notMaximalW** (*aut*, *U=None*)  
Tests if the language is maximal w.r.t. the property

### Parameters

- **aut** (*DFA|NFA*) – the automaton
- **U** (*DFA|NFA*) – Universe of permitted words ( $\Sigma^*$  as default)

**Return type** `bool`

**Raises** **PropertyNotSatisfied** if not satisfied

**notSatisfiesW** (*aut*)  
Return a witness of non-satisfaction of the property by the automaton language

**Parameters** **aut** (*DFA|NFA*) – the automaton

**Returns** word witness pair

**Return type** `tuple`

**satisfiesP** (*aut*)  
Satisfaction of the property by the automaton language

**Parameters** **aut** (*DFA|NFA*) – the automaton

**Return type** `bool`

## 13.4 Class IATProp

**class** `codes.IATProp` (*aut*, *name=None*)

Bases: `codes.IPTProp`

Input Altering Transducer Property

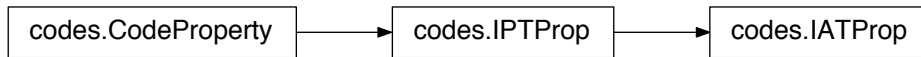

Constructor :param SFT *aut*: Input preserving transducer

**notSatisfiesW** (*aut*)

Return a witness of non-satisfaction of the property by the automaton language

**Parameters** *aut* (*DFA|NFA*) – the automaton

**Returns** word witness pair

**Return type** tuple

## 13.5 Class PrefixProp

**class** `codes.PrefixProp` (*t*)

Bases: `codes.TrajProp`, `codes.FixedProp`

Prefix Property

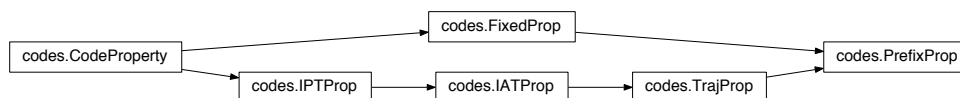

**satisfiesPrefixP** (*aut*)

Satisfaction of property by the automaton language: faster than `satisfiesP`

**Parameters** *aut* (*DFA|NFA*) – the automaton

**Return type** bool

## 13.6 Class ErrDetectProp

`codes.ErrDetectProp`

alias of `IPTPProp`

## 13.7 Class ErrCorrectProp

**class** `codes.ErrCorrectProp` (*t*)

Bases: `codes.IPTProp`

Error Correcting Property

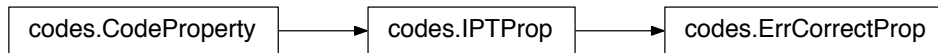

**notMaximalW** (*aut*, *U=None*)

Tests if the language is maximal w.r.t. the property

**Parameters**

- **aut** (*DFA|NFA*) – the automaton
- **U** (*DFA|NFA*) – Universe of permitted words ( $\Sigma^*$  as default)

**Return type** `bool`

**notSatisfiesW** (*aut*)

Satisfaction of the code property by the automaton language

**Parameters** **aut** (*DFA|NFA*) – the automaton

**Return type** `tuple`

**satisfiesP** (*aut*)

Satisfaction of the property by the automaton language

**See also:**

S. Konstantinidis: Transducers and the Properties of Error-Detection, Error-Correction and Finite-Delay Decodability. Journal Of Universal Computer Science 8 (2002), 278-291.

**Parameters** **aut** (*DFA|NFA*) – the automaton

**Return type** `bool`

## 13.8 Functions

`codes.buildTrajPropS` (*regex*, *sigma*)

Builds a TrajProp from a string regex

**Parameters**

- **regex** (*str*) – the regular expression
- **sigma** (*set*) – alphabet

**Return type** `TrajProp`

`codes.buildIATPropF` (*fname*)

Builds a IATProp from a FAdo SFT file

**Parameters** **fname** (*str*) – file name

**Return type** `IATProp`

`codes.buildIPTPropF (fname)`

Builds a IPTProp from a FAdo SFT file

**Parameters** `fname` (*str*) – file name

**Return type** IPTProp

`codes.buildIATProps (s)`

Builds a IATProp from a FAdo SFT string

**Parameters** `s` (*str*) – string containing SFT

**Return type** IATProp

`codes.buildIPTProps (s)`

Builds a IPTProp from a FAdo SFT string

**Parameters** `s` (*str*) – file name

**Return type** IPTProp

`codes.buildErrorDetectPropF (fname)`

Builds an Error Detecting Property

**Parameters** `fname` (*str*) – file name

**Return type** ErrDetectProp

`codes.buildErrorCorrectPropF (fname)`

Builds an Error Correcting Property

**Parameters** `fname` (*str*) – file name

**Return type** ErrCorrectProp

`codes.buildErrorDetectProps (s)`

Builds an Error Detecting Property from string

**Parameters** `s` (*str*) – transducer string

**Return type** ErrDetectProp

`codes.buildErrorCorrectProps (s)`

Builds an Error Correcting Property from string

**Parameters** `s` (*str*) – transducer string

**Return type** ErrCorrectProp

`codes.buildPrefixProperty (alphabet)`

Builds a Prefix Code Property

**Parameters** `alphabet` (*set*) – alphabet

**Return type** PrefixProp

`codes.buildTrajProps (regex, sigma)`

Builds a TrajProp from a string regexp

**Parameters**

- `regex` (*str*) – the regular expression
- `sigma` (*set*) – alphabet

**Return type** TrajProp

`codes.editDistanceW (auto)`

Compute the edit distance of a given regular language accepted by the NFA via Input-altering transducer.

**Attention:** language should have at least two words

**See also:**

Lila Kari, Stavros Konstantinidis, Steffen Kopecki, Meng Yang. An efficient algorithm for computing the edit distance of a regular language via input-altering transducers. arXiv:1406.1041 [cs.FL]

**Parameters** `auto` (*NFA*) – language recogniser

**Returns** The edit distance of the given regular language plus a witness pair

**Return type** tuple

`codes.exponentialDensityP` (*aut*)

Checks if language density is exponential

Using breadth first search (BFS)

**Attention:** `aut` should not have Epsilon transitions

**Parameters** `aut` (*NFA*) – the representation of the language

**Return type** bool

`codes.createInputAlteringSIDTrans` (*n*, *sigmaSet*)

Create an input-altering SID transducer based

**Parameters**

- `n` (*int*) – max number of errors
- `sigmaSet` (*set*) – alphabet

**Returns** a transducer representing the SID channel

**Return type** SFT

## MODULE: GRAIL COMPATIBILITY (GRAIL)

### GRAIL support.

GRAIL formats support. This is an auxiliary module that could be imported by fa.py

New in version 0.9.4.

### 14.1 Class ParserGrail

```
class grail.ParserGrail (no_table=1, table='.tableGrail')
```

Bases: `yappy_parser.Yappy`

A parser form GRAIL standard automata descriptions

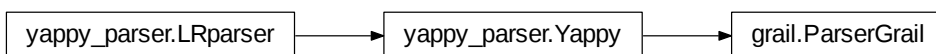

### 14.2 Class Grail

```
class grail.Grail
```

Bases: `object`

A class for Grail execution

Changed in version 0.9.8: tries to initialise `execPath` from `fadorc`

```
do (cmd, *args)
```

Execute Grail command

#### Parameters

- **cmd** (*string*) – name of the command
- **args** – arguments

#### Raises

- **GrailCommandError** – if the syntax is not correct an exception is raised
- **FAdoGeneralError** – if Grail fails to execute something

```
setExecPath (path)
```

Sets the path to the Grail executables

**Parameters** **path** (*str*) – the path to Grail executables

## 14.3 Functions

`grail.exportToGrail(fileName, fa)`

Saves a finite automaton definition to a file using Grail format

**Parameters**

- **fileName** (*string*) – file name
- **fa** (*FA*) – the FA

`grail.FAToGrail(f, fa)`

Saves a finite automaton definition to an open file using Grail format

**Parameters**

- **f** (*file*) – opened file
- **fa** (*FA*) – the FA

`grail.importFromGrailFile(fileName)`

Imports a finite automaton from a file in GRAIL format

The type of the object returned depends on the transition definition as well as the number of initial states declared

**Parameters** **fileName** (*str*) – file name

**Returns** the automata red

**Return type** FA

`grail.FAFromGrail(buffer)`

Imports a finite automaton from a buffer in GRAIL format

The type of the object returned depends on the transition definition as well as the number of initial states declared

**Parameters** **buffer** (*str*) – buffer file

**Returns** the automata red

**Return type** FA

## MODULE: VERSO LANGUAGE (VERSO)

### FAdo interface language and slave manager

Applications that want to use FAdo as a slave, just to process its objects should use this language to interface with it.

---

**Note:** Every object that is supposed to be available through this language, should be defined in objects and should have a method `vDescription`, returning the following list

0. A pair of descriptions, short and long, of the object
  1. A list of pairs
    - 1.0. A name of a format (*names should be unique*)
      - 1.1. The function that returns the string representation of the object in that format
        2. A tuple for each method provided
    - 2.0. Name of the command in verso
      - 2.1. A pair, short/long, descriptions of the method
      - 2.2. Number (n) of arguments of the method
      - 2.2+i. The type of the ith argument
      - 2.1+n. The return type `None` if does not return (in place transformation)
      - 2.2+n. The function implementing the method having a list as arguments
  3. and so on...

---

**class** `verso.ParserVerso` (*vsession*, *objects=None*, *no\_table=0*, *table='.tableVerso'*)

Bases: `yappy_parser.Yappy`

A parser for FAdo standard automata descriptions

#### Variables

- **vi** – virtual interaction session that knows how to communicate with the client
- **objects** – the list of objects known
- **info** – dictionary object -> (longdescription, [list of commands])
- **fun** – dictionary command -> (arity, return type, function)
- **format** – dictionary formatName -> function

#### Parameters

- **no\_table** – ignore the table if it exists
- **table** – name of the table



## A SMALL TUTORIAL FOR FADO

FAdo system is a set tools for regular languages manipulation.

Regular languages can be represented by regular expressions (regexp) or finite automata, among other formalisms. Finite automata may be deterministic (DFA) or non-deterministic (NFA). In FAdo these representations are implemented as Python classes. A full documentation of all classes and methods is [here](#).

To work with FAdo, after installation, import the following modules on a Python interpreter:

```
>>> from FAdo.fa import *
>>> from FAdo.reex import *
>>> from FAdo.fio import *
```

The module `fa` implements the classes for finite automata and the module `reex` the classes for regular expressions. The module `fio` implements methods for IO of automata and related models.

### General conventions

Methods which name ends in `P` test if the object verifies a given property and return `True` or `False`.

### Finite Automata

The top class for finite automata is the class `FA`, which has two main subclasses: `OFA` for one way finite automata and the class `TFA` for two-way finite automata. The class `OFA` implements the basic structure of a finite automaton shared by DFAs and NFAs. This class defines the following attributes:

**Sigma:** the input alphabet (set)

**States:** the list of states. It is a list such that each state is referred by its index whenever it is used (transitions, Final, etc).

**Initial:** the initial state (or a set of initial states for NFA). It is an index or list of indexes.

**Final:** the set of final states. It is a list of indexes.

In general, one should not create instances (objects) of class `OFA`. The class `DFA` and `NFA` implement DFAs and NFAs, respectively. The class `GFA` implements generalized NFAs that are used in the conversion between finite automata and regular expressions. All three classes inherit from class `OFA`.

For each class there are special methods for add/delete/modify alphabet symbols, states and transitions.

### DFAs

The following example shows how to build a DFA that accepts the words of  $\{0,1\}^*$  that are multiples of 3.

```
>>> m3= DFA()
>>> m3.setSigma(['0','1'])
>>> m3.addState('s1')
>>> m3.addState('s2')
>>> m3.addState('s3')
>>> m3.setInitial(0)
>>> m3.addFinal(0)
>>> m3.addTransition(0, '0', 0)
>>> m3.addTransition(0, '1', 1)
>>> m3.addTransition(1, '0', 2)
```



State names can be renamed in-place using:

```
>>> m.renameStates(range(len(m)))
```

```
DFA([(0, 1), (1, 0), (0, 0), (1, 1)])
```

Notice that `m` recognize all words over the alphabet  $\{0,1\}$ .

It is possible to generate a word recognisable by an automata (witness)

```
>>> u.witness()
'@epsilon'
```

In this case this allows to ensure that `u` recognizes the empty word.

This method is also useful for obtain a witness for the difference of two DFAs (`witnessDiff`).

To test if two DFAs are equivalent the the operator `==` (`equivalenceP`) can be used.

## NFAs

NFAs can be built and manipulated in a similar way. There is no distinction between NFAs with and without epsilon-transitions. But it is possible to test if a NFA has epsilon-transitions and convert between a NFA with epsilon-transitions to a (equivalent) NFA without them.

## Converting between NFAs and DFAs

The method `toDFA` allows to convert a NFA to an equivalent DFA by the subset construction method. The method `toNFA` migrates trivially a DFA to a NFA.

## Regular Expressions

A regular expression can be a symbol of the alphabet, the empty set (`@emptyset`), the empty word (`@epsilon`) or the concatenation or the union (+) or the Kleene star (\*) of a regular expression. Examples of regular expressions are `a+b`, `(a+ba)*`, and `(@epsilon+ a)(ba+ab+@emptyset)`.

The class `regex` is the base class for regular expressions and is used to represent an alphabet symbol. The classes `epsilon` and `emptyset` are the subclasses used for the empty set and empty word, respectively. Complex regular expressions are `concat`, `disj`, and `star`.

As for DFAs (and NFAs) we can build directly a regular expressions as a Python class:

```
>>> r = star(disj(regex("a"), concat(regex("b"), regex("a"))))
>>> print r
(a + (b a))*
```

But we can convert a string to a `regex` class or subclass, using the method `str2regex`.

```
>>> r = str2regex("(a+ba)*")
>>> print r
(a + (b a))*
```

For regular expressions there are several measures available: alphabetic size, (parse) tree size, string length, number of epsilons and star height. It is also possible to explicitly associate an alphabet to regular expression (even if some symbols do not appear in it) (`setSigma`)

There are several algebraic properties that can be used to obtain equivalent regular expressions of a smaller size. The method `reduced` transforms a regular expression into one equivalent without some obvious unnecessary epsilons, emptysets or stars.

Several methods that allows the manipulation of derivatives (or partial derivatives) by a symbol or by a word are implemented. However, the class `regex` does not deal with regular expressions module ACI properties (associativity, commutativity and idempotence of the union) (see class `xre`), so it is not possible to obtain all word derivatives of a given regular expression. This is not the case for partial derivatives.

To test if two regular expressions are equivalent the method `compare` can be used.

```
>>> r.compare(str2regexp("(a*(ba)*a)*"))
True
>>>
```

### Converting Finite Automata to Regular Expressions

For pedagogical purposes, it is implemented a recursive method that constructs a regular expression equivalent to a given DFA (regexp).

```
>>> print m3.regexp()
((0 + ((@epsilon + 0) (0* (@epsilon + 0)))) + ((1 + ((@epsilon + 0) (0* 1))) ((1 (0* 1))* (1 + (1
```

Methods based on state elimination techniques are usually more efficient, and produces much smaller regular expressions. We have implemented several heuristics for the elimination order.

```
>>> print m3.reCG()
((0 + (1 1)) + (((1 0) (1 + (0 0))* (0 1)))*
```

### Converting Regular Expressions to Finite Automata

Several methods to convert between regular expressions and NFAs are implemented. With the Thompson construction a NFA with epsilon transitions is obtained (nfaThompson). Epsilon free NFAs can be obtained by the Glushkov method (Position automata) (nfaPosition,) the partial derivatives method (nfaPD) or by the follow method (nfaFollow). The two last methods usually allows to obtain smaller NFAs.

```
>>> r.nfaThompson()
NFA([(' ', ' ', ' ', ' ', '0', '1', '2', '3', '8', '9'], ['a', 'b'], ['8'], ['9'], "([' ', '@epsilon',

>>> r.nfaPosition()
NFA([('Initial', "('a', 1)", "('b', 2)", "('a', 3)"], ['a', 'b'], ['Initial'], ['Initial', "('a',

>>> r.nfaPD()
NFA([(' (a + (b a))*', 'a (a + (b a))*'], ['a', 'b'], [' (a + (b a))*', [' (a + (b a))*'], "[ (star(
```

### General Example

Considering the several methods described before it is possible to convert between the different equivalent representations of regular languages, as well to perform several regularity preserving operations.

```
>>> r.nfaPosition().toDFA().minimal(complete=False)
DFA([('0', '2'], ['a', 'b'], '0', ['0'], "(['0', 'a', '0'), ('0', 'b', '2'), ('2', 'a', '0')])")
>>> m3 == m3.reCG().nfaPD().toDFA().minimal()
True
>>>
```

### More classes and modules

Several other classes and modules are also available, including:

class ICDFArnd (module rndfa.py): Random DFA generation

class FL (module fl.py): special methods for finite languages

class xre (module xre.py): extended regular expressions

module comboperations.py: implementation of several algorithms for several combined operations with DFAs and NFAs

module grail.py: compatibility with GRAIL

module transducers.py: several classes and methods for transducers

## INDICES AND TABLES

- *genindex*
- *modindex*
- *search*



**C**

cfg, 79  
codes, 89  
comboperations, 85  
common, 39

**f**

fa, 5  
fio, 41  
fl, 67

**g**

grail, 95  
graphs, 75

**r**

reex, 43  
rndfa, 83

**t**

transducers, 61

**v**

verso, 97

**X**

xre, 57



## A

acyclicP() (fa.OFA method), 11  
 add() (fa.SSemiGroup method), 36  
 addEdge() (graphs.DiGraph method), 76  
 addEdge() (graphs.Graph method), 75  
 addEpsilonLoops() (fa.NFA method), 26  
 addEpsilonLoops() (transducers.SFT method), 61  
 addFinal() (fa.FA method), 5  
 addGen() (fa.SSemiGroup method), 36  
 addInitial() (fa.NFA method), 26  
 addOutput() (transducers.SFT method), 61  
 addSigma() (fa.FA method), 5  
 addState() (fa.FA method), 5  
 addState() (fl.AFA method), 69  
 addTransition() (fa.DFA method), 15  
 addTransition() (fa.GFA method), 34  
 addTransition() (fa.NFA method), 26  
 addTransition() (fa.NFAr method), 32  
 addTransition() (fa.OFA method), 11  
 addTransition() (transducers.SFT method), 62  
 addTransitionQ() (fa.NFA method), 26  
 addTransitionQ() (transducers.SFT method), 62  
 addVertex() (graphs.Graph method), 75  
 addWords() (fl.FL method), 67  
 ADFA (class in fl), 70  
 aEquiv() (fa.DFA method), 15  
 AFA (class in fl), 69  
 allRegExps() (fa.OFA method), 11  
 alphabeticLength() (reex.regexp method), 43  
 alphabeticLength() (reex.specialConstant method), 49  
 ANFA (class in fl), 71  
 assignLow() (fa.GFA method), 35  
 assignNum() (fa.GFA method), 35  
 autobisimulation() (fa.NFA method), 26  
 autobisimulation2() (fa.NFA method), 26

## B

buildErrorCorrectPropF() (in module codes), 93  
 buildErrorCorrectPropS() (in module codes), 93  
 buildErrorDetectPropF() (in module codes), 93  
 buildErrorDetectPropS() (in module codes), 93  
 buildIATPropF() (in module codes), 92  
 buildIATPropS() (in module codes), 93  
 buildIPTPropF() (in module codes), 92  
 buildIPTPropS() (in module codes), 93  
 buildPrefixProperty() (in module codes), 93

buildTrajPropS() (in module codes), 92, 93

## C

cfg (module), 79  
 cfgGenerator (class in cfg), 80  
 CFGGrammar (class in cfg), 79  
 Chomsky() (cfg.CNF method), 79  
 closeEpsilon() (fa.NFA method), 26  
 CNF (class in cfg), 79  
 CodeProperty (class in codes), 89  
 codes (module), 89  
 comboperations (module), 85  
 common (module), 39  
 compare() (reex.regexp method), 43  
 compare() (xre.xre method), 57  
 compareMinimalDFA() (reex.regexp method), 44  
 compat() (fa.DFA method), 15  
 complete() (fa.OFA method), 11  
 complete() (fl.ADFA method), 70  
 completeDelta() (fa.GFA method), 35  
 completeMinimal() (fa.DFA method), 15  
 completeP() (fa.OFA method), 11  
 completeProduct() (fa.DFA method), 15  
 composition() (transducers.SFT method), 62  
 computeKernel() (fa.DFA method), 16  
 concat (class in reex), 53  
 concat() (fa.DFA method), 16  
 concat() (fa.NFA method), 27  
 concat() (transducers.SFT method), 62  
 concatenation() (xre.xre method), 57  
 concatI() (fa.DFA method), 16  
 concatWStar() (in module comboperations), 85  
 conjunction() (fa.FA method), 6  
 connective (class in reex), 52  
 countTransitions() (fa.FA method), 6  
 countTransitions() (fa.NFA method), 27  
 createInputAlteringSIDTrans() (in module codes), 94  
 cutPoints() (fa.OFA method), 11

## D

DCFA (class in fl), 68  
 deleteState() (fa.FA method), 6  
 deleteState() (fa.GFA method), 35  
 deleteState() (transducers.SFT method), 62  
 deleteStates() (fa.DFA method), 16  
 deleteStates() (fa.NFA method), 27

`deleteStates()` (fa.NFAr method), 33  
`deleteStates()` (fa.OFA method), 12  
`deleteStates()` (transducers.SFT method), 62  
`delFinal()` (fa.FA method), 6  
`delFinals()` (fa.FA method), 6  
`Delta()` (fa.DFA method), 15  
`delTransition()` (fa.DFA method), 16  
`delTransition()` (fa.NFA method), 27  
`delTransition()` (fa.NFAr method), 32  
`delTransition()` (transducers.SFT method), 62  
`derivative()` (reex.regex method), 44  
`derivative()` (reex.specialConstant method), 49  
`derivative()` (xre.xre method), 57  
`deterministicP()` (fa.NFA method), 27  
`DFA` (class in fa), 14  
`dfaDerivatives()` (xre.xre method), 57  
`dfaPosition()` (reex.regex method), 44  
`DFAtoADFA()` (in module fl), 73  
`DFS()` (fa.GFA method), 34  
`dfs()` (xre.xre method), 58  
`dfs_visit()` (fa.GFA method), 35  
`diff()` (fl.FL method), 67  
`DiGraph` (class in graphs), 75  
`DiGraphVm` (class in graphs), 76  
`directRank()` (fl.AFA method), 69  
`disj` (class in reex), 54  
`disj()` (fa.FA method), 6  
`disjunction()` (fa.FA method), 6  
`disjWStar()` (in module comboperations), 86  
`dist()` (fa.DFA method), 16  
`distMin()` (fa.DFA method), 17  
`distR()` (fa.DFA method), 17  
`distRMin()` (fa.DFA method), 17  
`distTS()` (fa.DFA method), 17  
`do()` (grail.Grail method), 95  
`dotDrawEdge()` (graphs.DiGraph static method), 76  
`dotDrawState()` (fa.FA method), 6  
`dotDrawState()` (fa.SemiDFA method), 10  
`dotDrawTransition()` (fa.FA method), 6  
`dotDrawTransition()` (fa.OFA static method), 12  
`dotDrawTransition()` (fa.SemiDFA static method), 10  
`dotDrawVertex()` (graphs.DiGraph method), 76  
`dotFormat()` (fa.FA method), 6  
`dotFormat()` (fa.NFA method), 27  
`dotFormat()` (fa.SemiDFA method), 10  
`dotFormat()` (graphs.DiGraph method), 76  
`dump()` (fa.OFA method), 12  
`dup()` (fa.DFA method), 17  
`dup()` (fa.GFA method), 35  
`dup()` (fa.NFA method), 27  
`dup()` (fa.OFA method), 12  
`dup()` (fl.ADFA method), 70  
`dup()` (transducers.SFT method), 63

## E

`editDistanceW()` (in module codes), 93  
`elim_unitary()` (cfg.CNF method), 79  
`elimEpsilon()` (fa.NFA method), 27

`elimEpsilonO()` (fa.NFAr method), 33  
`eliminate()` (fa.GFA method), 35  
`eliminateAll()` (fa.GFA method), 35  
`eliminateDeadName()` (fa.FA method), 7  
`eliminateEpsilonTransitions()` (fa.NFA method), 28  
`eliminateSingles()` (fa.OFA method), 12  
`eliminateState()` (fa.GFA method), 35  
`eliminateStout()` (fa.OFA method), 12  
`eliminateTSymbol()` (fa.NFA method), 28  
`emptyP()` (fa.OFA method), 12  
`emptyP()` (reex.emptyset method), 51  
`emptyP()` (reex.regex method), 44  
`emptyP()` (transducers.SFT method), 63  
`emptyset` (class in reex), 51  
`ensureDead()` (fl.AFA method), 69  
`enum()` (fa.EnumL method), 37  
`enumCrossSection()` (fa.EnumL method), 37  
`enumDFA()` (fa.DFA method), 17  
`EnumL` (class in fa), 37  
`enumNFA()` (fa.NFA method), 28  
`epsilon` (class in reex), 50  
`epsilonClosure()` (fa.NFA method), 28  
`epsilonLength()` (reex.emptyset method), 52  
`epsilonLength()` (reex.epsilon method), 51  
`epsilonLength()` (reex.regex method), 44  
`epsilonOutP()` (transducers.SFT method), 63  
`epsilonP()` (fa.NFA method), 28  
`epsilonP()` (reex.emptyset method), 52  
`epsilonP()` (reex.epsilon method), 51  
`epsilonP()` (reex.regex method), 44  
`epsilonP()` (transducers.SFT method), 63  
`epsilonPaths()` (fa.NFA method), 28  
`equal()` (fa.DFA method), 17  
`equivalentP()` (fa.FA method), 7  
`equivalentP()` (reex.regex method), 44  
`equivP()` (xre.xre method), 58  
`equivReduced()` (fa.NFA method), 28  
`ErrCorrectProp` (class in codes), 92  
`ErrDetectProp` (in module codes), 91  
`evalNumberOfStateCycles()` (fa.OFA method), 12  
`evalRank()` (fl.AFA method), 69  
`evalSymbol()` (fa.DFA method), 17  
`evalSymbol()` (fa.FA method), 7  
`evalSymbol()` (fa.NFA method), 28  
`evalSymbol()` (fa.OFA method), 12  
`evalSymbolI()` (fa.DFA method), 18  
`evalSymbolLI()` (fa.DFA method), 18  
`evalSymbolLI()` (fa.DFA method), 18  
`evalWordP()` (fa.DFA method), 18  
`evalWordP()` (fa.NFA method), 29  
`evalWordP()` (reex.regex method), 44  
`evalWordP()` (transducers.SFT method), 63  
`ewp()` (reex.emptyset method), 52  
`ewp()` (reex.epsilon method), 51  
`ewp()` (reex.regex method), 44  
`exponentialDensityP()` (in module codes), 94  
`exportToGrail()` (in module grail), 96

## F

FA (class in fa), 5  
 fa (module), 5  
 FAFromGrail() (in module grail), 96  
 FAToGrail() (in module grail), 96  
 fillStack() (fa.EnumL method), 37  
 filter() (fl.FL method), 67  
 finalCompP() (fa.DFA method), 18  
 finalCompP() (fa.NFA method), 29  
 finalCompP() (fa.OFA method), 12  
 finalP() (fa.FA method), 7  
 finalsP() (fa.FA method), 7  
 fio (module), 41  
 first() (reex.regex method), 44  
 first() (reex.specialConstant method), 50  
 FL (class in fl), 67  
 fl (module), 67  
 followLists() (reex.regex method), 45  
 followLists() (reex.specialConstant method), 50  
 followListsD() (reex.regex method), 45  
 followListsD() (reex.specialConstant method), 50  
 followListsStar() (reex.regex method), 45  
 followListsStar() (reex.specialConstant method), 50  
 forceToDCFA() (fl.ADFA method), 70  
 functionalP() (transducers.SFT method), 63

## G

generate() (cfg.cfgGenerator method), 80  
 generate() (cfg.reStringRGenerator method), 80  
 genRandomTrie() (in module fl), 73  
 genRndTrieBalanced() (in module fl), 72  
 genRndTriePrefix() (in module fl), 73  
 genRndTrieUnbalanced() (in module fl), 72  
 getLeaves() (fl.AFA method), 69  
 GFA (class in fa), 34  
 Grail (class in grail), 95  
 grail (module), 95  
 Graph (class in graphs), 75  
 graphs (module), 75  
 gRules() (in module cfg), 80

## H

half() (fa.NFA method), 29  
 hasStateIndexP() (fa.FA method), 7  
 hasTransitionP() (fa.NFA method), 29  
 hasTrapStateP() (fa.DFA method), 19  
 homogenousP() (fa.NFA method), 29  
 homogenousP() (fa.NFAr method), 33  
 hyperMinimal() (fa.DFA method), 19

## I

IATProp (class in codes), 91  
 ICDFArgen (class in rndfa), 83  
 ICDFArnd (class in rndfa), 83  
 ICDFArndIncomplete (class in rndfa), 84  
 iCompleteP() (fa.EnumL method), 37  
 importFromGrailFile() (in module grail), 96

inDegree() (fa.DFA method), 19  
 indexList() (fa.FA method), 7  
 infix() (fa.DFA method), 19  
 inIntersection() (transducers.SFT method), 63  
 initialComp() (fa.DFA method), 19  
 initialComp() (fa.NFA method), 29  
 initialComp() (fa.OFA method), 13  
 initialP() (fa.DFA method), 19  
 initialP() (fa.FA method), 7  
 initialSet() (fa.DFA method), 19  
 initialSet() (fa.FA method), 8  
 initStack() (fa.EnumL method), 37  
 inputS() (fa.FA method), 8  
 intersection() (fl.FL method), 67  
 intersection() (xre.xre method), 58  
 interWStar() (in module comboperations), 86  
 inverse() (graphs.DiGraph method), 76  
 inverse() (transducers.SFT method), 63  
 IPTProp (class in codes), 90

## J

joinStates() (fa.DFA method), 19

## L

last() (reex.regex method), 45  
 last() (reex.specialConstant method), 50  
 length (fl.DCFA attribute), 68  
 lEquivNFA() (fa.NFA method), 29  
 level() (fl.ADFA method), 70  
 linearForm() (reex.regex method), 45  
 linearForm() (reex.specialConstant method), 50  
 linearForm() (xre.xre method), 58  
 linearP() (reex.regex method), 46  
 lrEquivNFA() (fa.NFA method), 29

## M

makenonterminals() (cfg.CFGGrammar method), 79  
 maketerminals() (cfg.CFGGrammar method), 79  
 marked() (reex.regex method), 46  
 markNonEquivalent() (fa.DFA method), 19  
 markVertex() (graphs.DiGraphVm method), 77  
 maximalP() (codes.IPTProp method), 90  
 measure() (reex.emptyset method), 52  
 measure() (reex.epsilon method), 51  
 measure() (reex.regex method), 46  
 mergeInitial() (fl.ANFA method), 71  
 mergeLeaves() (fl.ANFA method), 71  
 mergeStates() (fa.DFA method), 20  
 mergeStates() (fa.NFAr method), 33  
 mergeStates() (fl.ANFA method), 72  
 mergeStatesSet() (fa.NFAr method), 33  
 minDFCA() (fl.ADFA method), 70  
 minimal() (fa.DFA method), 20  
 minimal() (fa.NFA method), 30  
 minimal() (fl.ADFA method), 70  
 minimalBrzowski() (fa.OFA method), 13  
 minimalBrzowskiP() (fa.OFA method), 13  
 minimalDFA() (fa.NFA method), 30

minimalHKP() (fa.DFA method), 20  
minimalHopcroft() (fa.DFA method), 20  
minimalHopcroftP() (fa.DFA method), 20  
minimalIncremental() (fa.DFA method), 20  
minimalIncrementalP() (fa.DFA method), 21  
minimalMoore() (fa.DFA method), 21  
minimalMooreSq() (fa.DFA method), 21  
minimalMooreSqP() (fa.DFA method), 21  
minimalNCompleteP() (fa.DFA method), 21  
minimalNotEquivP() (fa.DFA method), 21  
minimalP() (fa.DFA method), 21  
minimalP() (fl.ADFA method), 71  
minimalWatson() (fa.DFA method), 21  
minimalWatsonP() (fa.DFA method), 22  
minWord() (fa.EnumL method), 37  
minWordT() (fa.EnumL method), 37  
moveFinal() (fl.ANFA method), 72  
multiLineAutomaton() (fl.FL method), 67

## N

next() (fl.RndWGen method), 72  
next() (rndfa.ICDFArgen method), 83  
nextWord() (fa.EnumL method), 37  
NFA (class in fa), 25  
nfaFollow() (reex.regex method), 46  
nfaFollowEpsilon() (reex.regex method), 46  
nfaGlushkov() (reex.regex method), 46  
nfaNaiveFollow() (reex.regex method), 46  
nfaPD() (reex.regex method), 47  
nfaPD() (xre.xre method), 58  
nfaPDO() (reex.regex method), 47  
nfaPosition() (reex.regex method), 47  
nfaPSNF() (reex.regex method), 47  
NFAr (class in fa), 32  
nfaThompson() (reex.disj method), 54  
nfaThompson() (reex.epsilon method), 51  
nfaThompson() (reex.regex method), 47  
nfaThompson() (reex.star method), 52  
noBlankNames() (fa.FA method), 8  
notEmptyW() (transducers.SFT method), 63  
nonFunctionalW() (transducers.SFT method), 63  
normalize() (fa.GFA method), 35  
notequal() (fa.DFA method), 22  
notMaximalW() (codes.ErrCorrectProp method), 92  
notMaximalW() (codes.IPTProp method), 90  
notSatisfiesW() (codes.ErrCorrectProp method), 92  
notSatisfiesW() (codes.IATProp method), 91  
notSatisfiesW() (codes.IPTProp method), 90  
NULLABLE() (cfg.CFGGrammar method), 79

## O

OFA (class in fa), 11  
ordered() (fl.AFA method), 69  
outIntersection() (transducers.SFT method), 64  
outIntersectionDerived() (transducers.SFT method), 64  
outputS() (transducers.SFT method), 64

## P

pairGraph() (fa.DFA method), 22  
ParseReg (class in reex), 55  
ParserFAdo (class in fio), 41  
ParserGrail (class in grail), 95  
ParserVerso (class in verso), 97  
partialDerivativeC() (xre.xre method), 58  
partialDerivatives() (reex.epsilon method), 51  
partialDerivatives() (reex.regex method), 47  
PD() (reex.regex method), 43  
PD() (xre.xre method), 57  
plus() (fa.FA method), 8  
position (class in reex), 55  
pref() (fa.DFA method), 22  
PrefixProp (class in codes), 91  
print\_data() (fa.DFA method), 22  
product() (fa.DFA method), 22  
product() (fa.NFA method), 30  
productInput() (transducers.SFT method), 64

## R

re\_stateElimination() (fa.OFA method), 13  
re\_stateElimination\_nn() (fa.OFA method), 14  
readFromFile() (in module fio), 41  
reCG() (fa.OFA method), 13  
reCG\_nn() (fa.OFA method), 13  
reduced() (reex.regex method), 48  
reDynamicCycleHeuristic() (fa.OFA method), 13  
reex (module), 43  
regex (class in reex), 43  
regex() (fa.DFA method), 22  
regexSE() (fa.OFA method), 14  
renameState() (fa.FA method), 8  
renameStates() (fa.FA method), 8  
reorder() (fa.DFA method), 22  
reorder() (fa.GFA method), 35  
reorder() (fa.NFA method), 30  
rEquivNFA() (fa.NFA method), 30  
reStaticCycleHeuristic() (fa.OFA method), 13  
reStringRGenerator (class in cfg), 80  
reunion() (fl.FL method), 67  
reversal() (fa.FA method), 8  
reversal() (fa.NFA method), 30  
reversal() (reex.concat method), 53  
reversal() (reex.disj method), 54  
reversal() (reex.regex method), 48  
reversal() (reex.specialConstant method), 50  
reversal() (reex.star method), 53  
reversal() (transducers.SFT method), 64  
reverseTransitions() (fa.DFA method), 22  
reverseTransitions() (fa.NFA method), 30  
rndfa (module), 83  
RndWGen (class in fl), 72  
rpn() (reex.emptyset method), 52  
rpn() (reex.epsilon method), 51  
rpn() (reex.regex method), 48  
rpn2regex() (in module reex), 55  
runOnNFA() (transducers.SFT method), 64

runOnWord() (transducers.SFT method), 64

## S

same\_nullability() (fa.FA method), 8  
 satisfiesP() (codes.ErrCorrectProp method), 92  
 satisfiesP() (codes.IPTProp method), 90  
 satisfiesPrefixP() (codes.PrefixProp method), 91  
 saveToFile() (in module fio), 42  
 saveToString() (in module fa), 38  
 SemiDFA (class in fa), 10  
 setDeadState() (fl.AFA method), 69  
 setExecPath() (grail.Grail method), 95  
 setFinal() (fa.FA method), 9  
 setInitial() (fa.FA method), 9  
 setInitial() (fa.NFA method), 30  
 setInitial() (transducers.SFT method), 64  
 setOfSymbols() (reex.regexp method), 48  
 setOfSymbols() (reex.specialConstant method), 50  
 setOutput() (transducers.Transducer method), 61  
 setSigma() (fa.FA method), 9  
 setSigma() (fl.FL method), 68  
 setSigma() (reex.regexp method), 48  
 SFT (class in transducers), 61  
 shuffle() (fa.DFA method), 23  
 shuffle() (fa.NFA method), 30  
 sigmaInitialSegment() (in module fl), 72  
 simDiff() (fa.DFA method), 23  
 smallAlphabet() (in module cfg), 81  
 sMonoid() (fa.DFA method), 23  
 snf() (reex.epsilon method), 51  
 snf() (reex.regexp method), 48  
 sop() (fa.DFA method), 23  
 specialConstant (class in reex), 49  
 SPRegExp() (fa.OFA method), 11  
 square() (transducers.SFT method), 64  
 square\_fv() (transducers.SFT method), 64  
 SSemiGroup (class in fa), 36  
 sSemigroup() (fa.DFA method), 23  
 star (class in reex), 52  
 star() (fa.DFA method), 23  
 star() (fa.NFA method), 31  
 star() (transducers.SFT method), 64  
 starConcat() (in module comboperations), 85  
 starDisj() (in module comboperations), 86  
 starHeight() (reex.regexp method), 48  
 starI() (fa.DFA method), 23  
 starInter() (in module comboperations), 86  
 starInter0() (in module comboperations), 86  
 starWConcat() (in module comboperations), 85  
 stateChildren() (fa.DFA method), 23  
 stateChildren() (fa.GFA method), 35  
 stateChildren() (fa.NFA method), 31  
 stateChildren() (fa.OFA method), 14  
 stateIndex() (fa.FA method), 9  
 stateName() (fa.FA method), 9  
 str2regexp() (in module reex), 55  
 stringLength() (reex.regexp method), 48  
 stringToADFA() (in module fl), 73

stringToDFA() (in module fa), 38  
 stronglyConnectedComponents() (fa.NFA method), 31  
 subword() (fa.DFA method), 24  
 subword() (fa.NFA method), 31  
 succinctTransitions() (fa.DFA method), 24  
 succinctTransitions() (fa.FA method), 9  
 succinctTransitions() (fa.NFA method), 31  
 succinctTransitions() (fa.OFA method), 14  
 succinctTransitions() (transducers.Transducer method), 61  
 suff() (fa.DFA method), 24  
 suffixClosedP() (fl.FL method), 68  
 support() (reex.regexp method), 49  
 support() (reex.specialConstant method), 50  
 support() (xre.xre method), 58  
 syncPower() (fa.DFA method), 24  
 syncWords() (fa.DFA method), 24

## T

to\_x() (in module xre), 59  
 toADFA() (fa.DFA method), 24  
 toANFA() (fl.ADFA method), 71  
 toDFA() (fa.DFA method), 24  
 toDFA() (fa.NFA method), 31  
 toDFA() (fl.FL method), 68  
 toDFA() (reex.regexp method), 49  
 toDFA() (xre.xre method), 59  
 toGFA() (fa.DFA method), 24  
 toGFA() (fa.NFA method), 31  
 toGFA() (fa.OFA method), 14  
 toInNFA() (transducers.SFT method), 65  
 toNFA() (fa.DFA method), 24  
 toNFA() (fa.NFA method), 31  
 toNFA() (fa.NFAr method), 33  
 toNFA() (fl.ADFA method), 71  
 toNFA() (fl.FL method), 68  
 toNFA() (reex.regexp method), 49  
 toNFA() (xre.xre method), 59  
 toNFAr() (fa.NFA method), 31  
 toNFT() (transducers.SFT method), 65  
 toOutNFA() (transducers.SFT method), 65  
 topoSort() (fa.OFA method), 14  
 toSFT() (transducers.SFT method), 65  
 TrajProp (class in codes), 89  
 trajToTransducer() (codes.TrajProp static method), 89  
 Transducer (class in transducers), 61  
 transducers (module), 61  
 treeLength() (reex.regexp method), 49  
 trieFA() (fl.FL method), 68  
 trim() (fa.OFA method), 14  
 trim() (fl.ADFA method), 71  
 trim() (transducers.SFT method), 65  
 trimP() (fa.OFA method), 14

## U

union() (fa.FA method), 9  
 union() (transducers.SFT method), 65  
 unionSigma() (xre.xre method), 59

`uniqueRepr()` (fa.DFA method), [24](#)  
`uniqueRepr()` (fa.NFA method), [31](#)  
`uniqueRepr()` (fa.OFA method), [14](#)  
`unlinkSoleIncoming()` (fa.NFAr method), [34](#)  
`unlinkSoleOutgoing()` (fa.NFAr method), [34](#)  
`unmark()` (fa.DFA method), [25](#)  
`unmarked()` (reex.regex method), [49](#)  
`unmarked()` (reex.specialConstant method), [50](#)  
`usefulStates()` (fa.DFA method), [25](#)  
`usefulStates()` (fa.NFA method), [31](#)  
`usefulStates()` (fa.OFA method), [14](#)

## V

`vDescription()` (fa.DFA static method), [25](#)  
`vDescription()` (fa.NFA static method), [32](#)  
`verso` (module), [97](#)  
`vertexIndex()` (graphs.Graph method), [75](#)

## W

`weight()` (fa.GFA method), [36](#)  
`weightWithCycles()` (fa.GFA method), [36](#)  
`witness()` (fa.DFA method), [25](#)  
`witness()` (fa.NFA method), [32](#)  
`witnessDiff()` (fa.DFA method), [25](#)  
`Word` (class in common), [39](#)  
`wordDerivative()` (reex.regex method), [49](#)  
`wordDerivative()` (reex.specialConstant method), [50](#)  
`wordGenerator()` (fl.ADFA method), [71](#)  
`WordI()` (fa.SSemiGroup method), [36](#)  
`wordImage()` (fa.NFA method), [32](#)  
`WordPS()` (fa.SSemiGroup method), [36](#)  
`words()` (fa.FA method), [9](#)

## X

`xre` (class in xre), [57](#)  
`xre` (module), [57](#)
